# Supplementary material for: Seroprevalence of hepatitis B virus (HBV) and hepatitis C virus (HCV) among human immunodeficiency virus (HIV)-infected patients in an HBV endemic area in Brazil
Source: PubMed Central journal article supplement (PMC6128547; doi:10.1371/journal.pone.0203272), 2018-09-07
Supplement: pone.0203272.s003.pdf [file pone.0203272.s003.pdf]

# Statistical Report

All patients diagnosed with HIV during the study period (n=1717)

The FREQ Procedure

| sex    |           |         |                      |                    |
|--------|-----------|---------|----------------------|--------------------|
| sex    | Frequency | Percent | Cumulative Frequency | Cumulative Percent |
| female | 688       | 40.07   | 688                  | 40.07              |
| male   | 1029      | 59.93   | 1717                 | 100.00             |

Frequency Missing = 57

Variable: age (age)

sex=male

| Moments       |            |                  |            |
|---------------|------------|------------------|------------|
| N             | 1018       | Sum Weights      | 1018       |
| Mean          | 33.7043222 | Sum Observations | 34311      |
| Std Deviation | 12.3134257 | Variance         | 151.620453 |
| Skewness      | 0.44102847 | Kurtosis         | 0.14824806 |

| Quantiles (Definition 5) |          |
|--------------------------|----------|
| Quantile                 | Estimate |
| 100% Max                 | 73       |
| 99%                      | 65       |
| 95%                      | 57       |
| 90%                      | 50       |
| 75% Q3                   | 42       |
| 50% Median               | 32       |
| 25% Q1                   | 24       |
| 10%                      | 20       |
| 5%                       | 18       |
| 1%                       | 0        |
| 0% Min                   | 0        |

The UNIVARIATE Procedure

Variable: age (age)

sex=female

| <b>Moments</b>       |            |                         |            |
|----------------------|------------|-------------------------|------------|
| <b>N</b>             | 678        | <b>Sum Weights</b>      | 678        |
| <b>Mean</b>          | 33.939528  | <b>Sum Observations</b> | 23011      |
| <b>Std Deviation</b> | 13.3768534 | <b>Variance</b>         | 178.940208 |
| <b>Skewness</b>      | 0.10574218 | <b>Kurtosis</b>         | 0.17126393 |

| <b>Quantiles (Definition 5)</b> |                 |
|---------------------------------|-----------------|
| <b>Quantile</b>                 | <b>Estimate</b> |
| <b>100% Max</b>                 | 81              |
| <b>99%</b>                      | 65              |
| <b>95%</b>                      | 57              |
| <b>90%</b>                      | 53              |
| <b>75% Q3</b>                   | 43              |
| <b>50% Median</b>               | 33              |
| <b>25% Q1</b>                   | 25              |
| <b>10%</b>                      | 19              |
| <b>5%</b>                       | 16              |
| <b>1%</b>                       | 0               |
| <b>0% Min</b>                   | 0               |

The UNIVARIATE Procedure

The NPAR1WAY Procedure

| <b>Wilcoxon Scores (Rank Sums) for Variable age<br/>Classified by Variable sex</b> |          |                          |                              |                             |                       |
|------------------------------------------------------------------------------------|----------|--------------------------|------------------------------|-----------------------------|-----------------------|
| <b>sex</b>                                                                         | <b>N</b> | <b>Sum of<br/>Scores</b> | <b>Expected<br/>Under H0</b> | <b>Std Dev<br/>Under H0</b> | <b>Mean<br/>Score</b> |
| <b>female</b>                                                                      | 678      | 583619.50                | 575283.0                     | 9876.14920                  | 860.795723            |
| <b>male</b>                                                                        | 1018     | 855436.50                | 863773.0                     | 9876.14920                  | 840.310904            |

Average scores were used for ties.

| <b>Wilcoxon Two-Sample Test</b> |             |
|---------------------------------|-------------|
| <b>Statistic</b>                | 583619.5000 |
| <b>Normal Approximation</b>     |             |
| <b>Z</b>                        | 0.8441      |

| <b>Wilcoxon Two-Sample Test</b> |        |
|---------------------------------|--------|
| <b>One-Sided Pr &gt; Z</b>      | 0.1993 |
| <b>Two-Sided Pr &gt;  Z </b>    | 0.3986 |

**All patients who were tested for HBV and HCV (n=1259)**

The SAS System

The FREQ Procedure

| <b>HIV_HBV</b>      |                  |                |                                 |                               |
|---------------------|------------------|----------------|---------------------------------|-------------------------------|
| <b>HIV_HBV</b>      | <b>Frequency</b> | <b>Percent</b> | <b>Cumulative<br/>Frequency</b> | <b>Cumulative<br/>Percent</b> |
| <b>non_reactive</b> | 1218             | 96.90          | 1218                            | 96.90                         |
| <b>reagent</b>      | 39               | 3.10           | 1257                            | 100.00                        |

Frequency Missing = 2

| <b>HIV_HCV</b>      |                  |                |                                 |                               |
|---------------------|------------------|----------------|---------------------------------|-------------------------------|
| <b>HIV_HCV</b>      | <b>Frequency</b> | <b>Percent</b> | <b>Cumulative<br/>Frequency</b> | <b>Cumulative<br/>Percent</b> |
| <b>non_reactive</b> | 1218             | 96.90          | 1218                            | 96.90                         |
| <b>reagent</b>      | 39               | 3.10           | 1257                            | 100.00                        |

Frequency Missing = 2

| <b>HIV_HBV_HCV</b>  |                  |                |                                 |                               |
|---------------------|------------------|----------------|---------------------------------|-------------------------------|
| <b>HIV_HBV_HCV</b>  | <b>Frequency</b> | <b>Percent</b> | <b>Cumulative<br/>Frequency</b> | <b>Cumulative<br/>Percent</b> |
| <b>non_reactive</b> | 1218             | 99.84          | 1218                            | 99.84                         |
| <b>reagent</b>      | 2                | 0.16           | 1220                            | 100.00                        |

Frequency Missing = 2

| <b>hepatitis</b>    |                  |                |                                 |                               |
|---------------------|------------------|----------------|---------------------------------|-------------------------------|
| <b>hepatitis</b>    | <b>Frequency</b> | <b>Percent</b> | <b>Cumulative<br/>Frequency</b> | <b>Cumulative<br/>Percent</b> |
| <b>non_reactive</b> | 1179             | 93.65          | 1179                            | 93.65                         |
| <b>reagent</b>      | 80               | 6.35           | 1259                            | 100.00                        |

The SAS System

The FREQ Procedure  
HIV-monoinfected\_and\_HIV\_hepatitis

| <b>sex</b>    |                  |                |                                 |                               |
|---------------|------------------|----------------|---------------------------------|-------------------------------|
| <b>sex</b>    | <b>Frequency</b> | <b>Percent</b> | <b>Cumulative<br/>Frequency</b> | <b>Cumulative<br/>Percent</b> |
| <b>female</b> | 528              | 41.94          | 528                             | 41.94                         |
| <b>male</b>   | 731              | 58.06          | 1259                            | 100.00                        |

The SAS System

The UNIVARIATE Procedure  
Variable: age (age)  
sex=male

| <b>Moments</b>       |            |                    |            |
|----------------------|------------|--------------------|------------|
| <b>N</b>             | 731        | <b>Sum Weights</b> | 731        |
| <b>Mean</b>          | 33.1340629 |                    |            |
| <b>Std Deviation</b> | 12.1459651 | <b>Variance</b>    | 147.524468 |
| <b>Skewness</b>      | 0.47682548 | <b>Kurtosis</b>    | 0.08956363 |

| <b>Quantiles (Definition 5)</b> |                 |
|---------------------------------|-----------------|
| <b>Quantile</b>                 | <b>Estimate</b> |
| <b>100% Max</b>                 | 70              |
| <b>99%</b>                      | 63              |
| <b>95%</b>                      | 56              |
| <b>90%</b>                      | 50              |
| <b>75% Q3</b>                   | 41              |
| <b>50% Median</b>               | 31              |
| <b>25% Q1</b>                   | 24              |
| <b>10%</b>                      | 20              |
| <b>5%</b>                       | 18              |
| <b>1%</b>                       | 0               |
| <b>0% Min</b>                   | 0               |

The SAS System

The UNIVARIATE Procedure

Variable: age (age)

sex=female

| <b>Moments</b>       |            |                    |            |
|----------------------|------------|--------------------|------------|
| <b>N</b>             | 524        | <b>Sum Weights</b> | 524        |
| <b>Mean</b>          | 33.7232824 |                    |            |
| <b>Std Deviation</b> | 13.1700799 | <b>Variance</b>    | 173.451006 |
| <b>Skewness</b>      | 0.20688551 | <b>Kurtosis</b>    | 0.25039397 |

**Quantiles (Definition 5)**

| <b>Quantile</b>   | <b>Estimate</b> |
|-------------------|-----------------|
| <b>100% Max</b>   | 81              |
| <b>99%</b>        | 65              |
| <b>95%</b>        | 56              |
| <b>90%</b>        | 53              |
| <b>75% Q3</b>     | 42              |
| <b>50% Median</b> | 32              |
| <b>25% Q1</b>     | 25              |
| <b>10%</b>        | 19              |
| <b>5%</b>         | 17              |
| <b>1%</b>         | 0               |
| <b>0% Min</b>     | 0               |

The SAS System

The NPAR1WAY Procedure

**Wilcoxon Scores (Rank Sums) for Variable age  
Classified by Variable sex**

| <b>sex</b>    | <b>N</b> | <b>Sum of<br/>Scores</b> | <b>Expected<br/>Under H0</b> | <b>Std Dev<br/>Under H0</b> | <b>Mean<br/>Score</b> |
|---------------|----------|--------------------------|------------------------------|-----------------------------|-----------------------|
| <b>female</b> | 524      | 336564.0                 | 329072.0                     | 6329.47918                  | 642.297710            |
| <b>male</b>   | 731      | 451576.0                 | 459068.0                     | 6329.47918                  | 617.751026            |

**Average scores were used for ties.**

| <b>Wilcoxon Two-Sample Test</b> |             |
|---------------------------------|-------------|
| <b>Statistic</b>                | 336564.0000 |
| <b>Z</b>                        | 1.1836      |
| <b>One-Sided Pr &gt; Z</b>      | 0.1183      |
| <b>Two-Sided Pr &gt;  Z </b>    | 0.2366      |

The SAS System

The UNIVARIATE Procedure  
 Variable: age (age)  
 hepatitis=reagent sex=male

| <b>Moments</b>       |            |                         |            |
|----------------------|------------|-------------------------|------------|
| <b>N</b>             | 51         | <b>Sum Weights</b>      | 51         |
| <b>Mean</b>          | 35.8823529 | <b>Sum Observations</b> | 1830       |
| <b>Std Deviation</b> | 10.8658125 | <b>Variance</b>         | 118.065882 |
| <b>Skewness</b>      | 0.1261037  | <b>Kurtosis</b>         | -0.6400289 |

| <b>Quantiles (Definition 5)</b> |                 |
|---------------------------------|-----------------|
| <b>Quantile</b>                 | <b>Estimate</b> |
| <b>100% Max</b>                 | 58              |
| <b>99%</b>                      | 58              |
| <b>95%</b>                      | 54              |
| <b>90%</b>                      | 52              |
| <b>75% Q3</b>                   | 44              |
| <b>50% Median</b>               | 35              |
| <b>25% Q1</b>                   | 28              |
| <b>10%</b>                      | 23              |
| <b>5%</b>                       | 18              |
| <b>1%</b>                       | 14              |
| <b>0% Min</b>                   | 14              |

The SAS System

The UNIVARIATE Procedure  
 Variable: age (age)  
 hepatitis=reagent sex=female

| <b>Moments</b>       |            |                         |            |
|----------------------|------------|-------------------------|------------|
| <b>N</b>             | 29         | <b>Sum Weights</b>      | 29         |
| <b>Mean</b>          | 32.7931034 | <b>Sum Observations</b> | 951        |
| <b>Std Deviation</b> | 10.523373  | <b>Variance</b>         | 110.741379 |
| <b>Skewness</b>      | 0.68765047 | <b>Kurtosis</b>         | 0.08078095 |

| <b>Quantiles (Definition 5)</b> |                 |
|---------------------------------|-----------------|
| <b>Quantile</b>                 | <b>Estimate</b> |
| <b>100% Max</b>                 | 60              |
| <b>99%</b>                      | 60              |
| <b>95%</b>                      | 51              |
| <b>90%</b>                      | 47              |
| <b>75% Q3</b>                   | 39              |
| <b>50% Median</b>               | 33              |
| <b>25% Q1</b>                   | 25              |
| <b>10%</b>                      | 20              |
| <b>5%</b>                       | 18              |
| <b>1%</b>                       | 18              |
| <b>0% Min</b>                   | 18              |

The SAS System

The NPARIWAY Procedure  
hepatitis=reagent

| <b>Wilcoxon Scores (Rank Sums) for Variable age<br/>Classified by Variable sex</b> |          |                          |                              |                             |                       |
|------------------------------------------------------------------------------------|----------|--------------------------|------------------------------|-----------------------------|-----------------------|
| <b>sex</b>                                                                         | <b>N</b> | <b>Sum of<br/>Scores</b> | <b>Expected<br/>Under H0</b> | <b>Std Dev<br/>Under H0</b> | <b>Mean<br/>Score</b> |
| <b>female</b>                                                                      | 29       | 1041.50                  | 1174.50                      | 99.834206                   | 35.913793             |
| <b>male</b>                                                                        | 51       | 2198.50                  | 2065.50                      | 99.834206                   | 43.107843             |

**Average scores were used for ties.**

| <b>Wilcoxon Two-Sample Test</b> |           |
|---------------------------------|-----------|
| <b>Statistic</b>                | 1041.5000 |
| <b>Normal Approximation</b>     |           |
| <b>Z</b>                        | -1.3272   |

| <b>Wilcoxon Two-Sample Test</b> |        |
|---------------------------------|--------|
| <b>One-Sided Pr &lt; Z</b>      | 0.0922 |
| <b>Two-Sided Pr &gt;  Z </b>    | 0.1844 |

**Table 1.** Socio-demographic characteristics of HIV-infected patients

The SAS System

The FREQ Procedure

|                  |
|------------------|
| <b>Frequency</b> |
| <b>Col Pct</b>   |

| <b>Table of Age of HIV_monoinfected_vs_HIV_HBV</b> |                |                         |              |
|----------------------------------------------------|----------------|-------------------------|--------------|
|                                                    | <b>HIV_HBV</b> | <b>HIV_monoinfected</b> | <b>Total</b> |
| <b>18-29</b>                                       | 10             | 476                     | 486          |
|                                                    | 25.64          | 40.51                   |              |
| <b>30-49</b>                                       | 23             | 505                     | 528          |
|                                                    | 58.98          | 42.98                   |              |
| <b>0-17</b>                                        | 0              | 55                      | 55           |
|                                                    | 0.00           | 4.68                    |              |
| <b>&gt;_50</b>                                     | 6              | 139                     | 145          |
|                                                    | 15.38          | 11.83                   |              |
| <b>Total</b>                                       | 39             | 1175                    | 1214         |
| <b>Frequency Missing = 45</b>                      |                |                         |              |

Statistics for Table of transformed\_age\_1 by HIV\_monoinfected\_vs\_HIV\_HBV

| <b>Statistic</b>                                                                                       | <b>DF</b> | <b>Value</b> | <b>Prob</b> |
|--------------------------------------------------------------------------------------------------------|-----------|--------------|-------------|
| <b>Chi-Square</b>                                                                                      | 3         | 6.5303       | 0.0885      |
| <b>Likelihood Ratio Chi-Square</b>                                                                     | 3         | 8.3443       | 0.0394      |
| <b>Mantel-Haenszel Chi-Square</b>                                                                      | 1         | 1.2403       | 0.2654      |
| <b>Phi Coefficient</b>                                                                                 |           | 0.0733       |             |
| <b>Contingency Coefficient</b>                                                                         |           | 0.0731       |             |
| <b>Cramer's V</b>                                                                                      |           | 0.0733       |             |
| <b>WARNING: 25% of the cells have expected counts less than 5. Chi-Square may not be a valid test.</b> |           |              |             |



Effective Sample Size = 1214  
 Frequency Missing = 45

**Frequency**  
**Col Pct**

**Table of sex by HIV\_monoinfected\_vs\_HIV\_HBV**

|               | <b>HIV_HBV</b> | <b>HIV_monoinfected</b> | <b>Total</b> |
|---------------|----------------|-------------------------|--------------|
| <b>female</b> | 17             | 499                     | 516          |
|               | 43.59          | 42.32                   |              |
| <b>male</b>   | 22             | 680                     | 702          |
|               | 56.41          | 57.68                   |              |
| <b>Total</b>  | 39             | 1179                    | 1218         |

**Frequency Missing = 41**

Statistics for Table of sex by HIV\_monoinfected\_vs\_HIV\_HBV

| <b>Statistic</b>                   | <b>DF</b> | <b>Value</b> | <b>Prob</b> |
|------------------------------------|-----------|--------------|-------------|
| <b>Chi-Square</b>                  | 1         | 0.0248       | 0.8749      |
| <b>Likelihood Ratio Chi-Square</b> | 1         | 0.0247       | 0.8751      |
| <b>Continuity Adj. Chi-Square</b>  | 1         | 0.0000       | 1.0000      |
| <b>Mantel-Haenszel Chi-Square</b>  | 1         | 0.0247       | 0.8750      |
| <b>Phi Coefficient</b>             |           | 0.0045       |             |
| <b>Contingency Coefficient</b>     |           | 0.0045       |             |
| <b>Cramer's V</b>                  |           | 0.0045       |             |

**Fisher's Exact Test**

|                                 |        |
|---------------------------------|--------|
| <b>Cell (1,1) Frequency (F)</b> | 17     |
| <b>Left-sided Pr &lt;= F</b>    | 0.6288 |
| <b>Right-sided Pr &gt;= F</b>   | 0.4997 |
| <b>Table Probability (P)</b>    | 0.1285 |
| <b>Two-sided Pr &lt;= P</b>     | 0.8708 |

Effective Sample Size = 1218  
 Frequency Missing = 41

**Frequency**  
**Col Pct**

□

| <b>Table of marital_status by HIV_monoinfected_vs_HIV_HBV</b> |                |                         |              |
|---------------------------------------------------------------|----------------|-------------------------|--------------|
|                                                               | <b>HIV_HBV</b> | <b>HIV_monoinfected</b> | <b>Total</b> |
| <b>divorced</b>                                               | 4              | 100                     | 104          |
|                                                               | 10.26          | 8.54                    |              |
| <b>married</b>                                                | 17             | 459                     | 476          |
|                                                               | 43.59          | 39.20                   |              |
| <b>single</b>                                                 | 18             | 562                     | 580          |
|                                                               | 46.15          | 47.99                   |              |
| <b>widower</b>                                                | 0              | 50                      | 50           |
|                                                               | 0.00           | 4.27                    |              |
| <b>Total</b>                                                  | 39             | 1171                    | 1210         |
| <b>Frequency Missing = 49</b>                                 |                |                         |              |

Statistics for Table of marital\_status by HIV\_monoinfected\_vs\_HIV\_HBV

| <b>Statistic</b>                                                                                       | <b>DF</b> | <b>Value</b> | <b>Prob</b> |
|--------------------------------------------------------------------------------------------------------|-----------|--------------|-------------|
| <b>Chi-Square</b>                                                                                      | 3         | 2.0064       | 0.5711      |
| <b>Likelihood Ratio Chi-Square</b>                                                                     | 3         | 3.6042       | 0.3075      |
| <b>Mantel-Haenszel Chi-Square</b>                                                                      | 1         | 1.0948       | 0.2954      |
| <b>Phi Coefficient</b>                                                                                 |           | 0.0407       |             |
| <b>Contingency Coefficient</b>                                                                         |           | 0.0407       |             |
| <b>Cramer's V</b>                                                                                      |           | 0.0407       |             |
| <b>WARNING: 25% of the cells have expected counts less than 5. Chi-Square may not be a valid test.</b> |           |              |             |

Effective Sample Size = 1210

Frequency Missing = 49

**Frequency**  
**Col Pct**

| <b>Table of ethnicity by HIV_monoinfected_vs_HIV_HBV</b> |                |                         |              |
|----------------------------------------------------------|----------------|-------------------------|--------------|
|                                                          | <b>HIV_HBV</b> | <b>HIV_monoinfected</b> | <b>Total</b> |
| <b>black</b>                                             | 2              | 42                      | 44           |
|                                                          | 5.56           | 3.65                    |              |
| <b>brown</b>                                             | 14             | 400                     | 414          |
|                                                          | 38.89          | 34.72                   |              |
| <b>other</b>                                             | 0              | 6                       | 6            |
|                                                          | 0.00           | 0.52                    |              |
| <b>white</b>                                             | 20             | 704                     | 724          |
|                                                          | 55.55          | 61.11                   |              |
| <b>Total</b>                                             | 36             | 1152                    | 1188         |
| <b>Frequency Missing = 71</b>                            |                |                         |              |

Statistics for Table of ethnicity by HIV\_monoinfected\_vs\_HIV\_HBV

| <b>Statistic</b>                                                                                       | <b>DF</b> | <b>Value</b> | <b>Prob</b> |
|--------------------------------------------------------------------------------------------------------|-----------|--------------|-------------|
| <b>Chi-Square</b>                                                                                      | 3         | 0.8820       | 0.8298      |
| <b>Likelihood Ratio Chi-Square</b>                                                                     | 3         | 1.0181       | 0.7969      |
| <b>Mantel-Haenszel Chi-Square</b>                                                                      | 1         | 0.5971       | 0.4397      |
| <b>Phi Coefficient</b>                                                                                 |           | 0.0272       |             |
| <b>Contingency Coefficient</b>                                                                         |           | 0.0272       |             |
| <b>Cramer's V</b>                                                                                      |           | 0.0272       |             |
| <b>WARNING: 25% of the cells have expected counts less than 5. Chi-Square may not be a valid test.</b> |           |              |             |

Effective Sample Size = 1188

Frequency Missing = 71

**Frequency**  
**Col Pct**

Table of transformed\_degree\_level by HIV\_monoinfected\_vs\_HIV\_HBV

|              | HIV_HBV     | HIV_monoinfected | Total |
|--------------|-------------|------------------|-------|
| ≤ 8 years    | 25<br>65.79 | 551<br>48.72     | 576   |
| > 8 years    | 13<br>34.21 | 580<br>51.28     | 593   |
| <b>Total</b> | 38          | 1131             | 1169  |

**Frequency Missing = 90**

Statistics for Table of degree\_level by HIV\_monoinfected\_vs\_HIV\_HBV

| Statistic                          | DF | Value  | Prob   |
|------------------------------------|----|--------|--------|
| <b>Chi-Square</b>                  | 1  | 4.2868 | 0.0384 |
| <b>Likelihood Ratio Chi-Square</b> | 1  | 4.3516 | 0.0370 |
| <b>Continuity Adj. Chi-Square</b>  | 1  | 3.6310 | 0.0567 |
| <b>Mantel-Haenszel Chi-Square</b>  | 1  | 4.2831 | 0.0385 |
| <b>Phi Coefficient</b>             |    | 0.0606 |        |
| <b>Contingency Coefficient</b>     |    | 0.0604 |        |
| <b>Cramer's V</b>                  |    | 0.0606 |        |

| <b>Fisher's Exact Test</b>      |        |
|---------------------------------|--------|
| <b>Cell (1,1) Frequency (F)</b> | 25     |
| <b>Left-sided Pr ≤ F</b>        | 0.9878 |
| <b>Right-sided Pr ≥ F</b>       | 0.0278 |
| <b>Table Probability (P)</b>    | 0.0156 |
| <b>Two-sided Pr ≤ P</b>         | 0.0471 |

Effective Sample Size = 1169  
Frequency Missing = 90

**Frequency**  
**Col Pct**

□

| <b>Table of sexual_behavior by HIV_monoinfected_vs_HIV_HBV</b> |                |                         |              |
|----------------------------------------------------------------|----------------|-------------------------|--------------|
|                                                                | <b>HIV_HBV</b> | <b>HIV_monoinfected</b> | <b>Total</b> |
| <b>heterosexual</b>                                            | 32             | 880                     | 912          |
|                                                                | 86.49          | 77.13                   |              |
| <b>homosexual/bisexual</b>                                     | 5              | 261                     | 266          |
|                                                                | 13.51          | 22.87                   |              |
| <b>Total</b>                                                   | 37             | 1141                    | 1178         |
| <b>Frequency Missing = 81</b>                                  |                |                         |              |

| <b>Statistic</b>                   | <b>DF</b> | <b>Value</b> | <b>Prob</b> |
|------------------------------------|-----------|--------------|-------------|
| <b>Chi-Square</b>                  | 1         | 1.7965       | 0.1801      |
| <b>Likelihood Ratio Chi-Square</b> | 1         | 2.0103       | 0.1562      |
| <b>Continuity Adj. Chi-Square</b>  | 1         | 1.3009       | 0.2541      |
| <b>Mantel-Haenszel Chi-Square</b>  | 1         | 1.7949       | 0.1803      |
| <b>Phi Coefficient</b>             |           | 0.0391       |             |
| <b>Contingency Coefficient</b>     |           | 0.0390       |             |
| <b>Cramer's V</b>                  |           | 0.0391       |             |

| <b>Fisher's Exact Test</b>      |        |
|---------------------------------|--------|
| <b>Cell (1,1) Frequency (F)</b> | 32     |
| <b>Left-sided Pr &lt;= F</b>    | 0.9457 |
| <b>Right-sided Pr &gt;= F</b>   | 0.1241 |
| <b>Table Probability (P)</b>    | 0.0698 |
| <b>Two-sided Pr &lt;= P</b>     | 0.2312 |

Effective Sample Size = 1178  
Frequency Missing = 81

**Frequency**  
**Col Pct**

WARNING: 20% of the data are missing.

| <b>Table of way_of_acquiring_virus by HIV_monoinfected_vs_HIV_HBV</b> |                |                         |              |
|-----------------------------------------------------------------------|----------------|-------------------------|--------------|
|                                                                       | <b>HIV_HBV</b> | <b>HIV_monoinfected</b> | <b>Total</b> |
| <b>OUTROS</b>                                                         | 0              | 27                      | 27           |
|                                                                       | 0.00           | 2.31                    |              |
| <b>sexual</b>                                                         | 38             | 1144                    | 1182         |
|                                                                       | 100.00         | 97.69                   |              |
| <b>Total</b>                                                          | 38             | 1171                    | 1209         |

**Frequency Missing = 50**

Statistics for Table of way\_of\_acquiring\_virus by HIV\_monoinfected\_vs\_HIV\_HBV

| <b>Statistic</b>                   | <b>DF</b> | <b>Value</b> | <b>Prob</b> |
|------------------------------------|-----------|--------------|-------------|
| <b>Chi-Square</b>                  | 1         | 0.8962       | 0.3438      |
| <b>Likelihood Ratio Chi-Square</b> | 1         | 1.7444       | 0.1866      |
| <b>Continuity Adj. Chi-Square</b>  | 1         | 0.1513       | 0.6973      |
| <b>Mantel-Haenszel Chi-Square</b>  | 1         | 0.8954       | 0.3440      |
| <b>Phi Coefficient</b>             |           | -0.0272      |             |
| <b>Contingency Coefficient</b>     |           | 0.0272       |             |
| <b>Cramer's V</b>                  |           | -0.0272      |             |

**WARNING: 25% of the cells have expected counts less than 5. Chi-Square may not be a valid test.**

| <b>Fisher's Exact Test</b>      |        |
|---------------------------------|--------|
| <b>Cell (1,1) Frequency (F)</b> | 0      |
| <b>Left-sided Pr &lt;= F</b>    | 0.4182 |
| <b>Right-sided Pr &gt;= F</b>   | 1.0000 |
| <b>Table Probability (P)</b>    | 0.4182 |
| <b>Two-sided Pr &lt;= P</b>     | 1.0000 |

Effective Sample Size = 1209  
Frequency Missing = 50

**Frequency**

**Col Pct**

□ **Table of diagnostic\_period by HIV\_monoinfected\_vs\_HIV\_HBV**

|               | <b>HIV_HBV</b> | <b>HIV_monoinfected</b> | <b>Total</b> |
|---------------|----------------|-------------------------|--------------|
| <b>&gt;_5</b> | 21<br>53.85    | 528<br>44.79            | 549          |
| <b>3 to 5</b> | 7<br>17.95     | 227<br>19.25            | 234          |
| <b>&lt;_3</b> | 11<br>28.20    | 424<br>35.96            | 435          |
| <b>Total</b>  | 39             | 1179                    | 1218         |

**Frequency Missing = 41**

Statistics for Table of diagnostic\_period by HIV\_monoinfected\_vs\_HIV\_HBV

| <b>Statistic</b>                   | <b>DF</b> | <b>Value</b> | <b>Prob</b> |
|------------------------------------|-----------|--------------|-------------|
| <b>Chi-Square</b>                  | 2         | 1.3574       | 0.5073      |
| <b>Likelihood Ratio Chi-Square</b> | 2         | 1.3671       | 0.5048      |
| <b>Mantel-Haenszel Chi-Square</b>  | 1         | 1.3354       | 0.2478      |
| <b>Phi Coefficient</b>             |           | 0.0334       |             |
| <b>Contingency Coefficient</b>     |           | 0.0334       |             |
| <b>Cramer's V</b>                  |           | 0.0334       |             |

Effective Sample Size = 1218

Frequency Missing = 41

**Frequency**

**Col Pct**

□ **Table of Alcohol by HIV\_monoinfected\_vs\_HIV\_HBV**

|              | <b>HIV_HBV</b> | <b>HIV_monoinfected</b> | <b>Total</b> |
|--------------|----------------|-------------------------|--------------|
| <b>no</b>    | 29             | 900                     | 929          |
|              | 76.32          | 81.45                   |              |
| <b>yes</b>   | 9              | 205                     | 214          |
|              | 23.68          | 18.55                   |              |
| <b>Total</b> | 38             | 1105                    | 1143         |

**Frequency Missing = 116**

Statistics for Table of Alcohol by HIV\_monoinfected\_vs\_HIV\_HBV

| <b>Statistic</b>                   | <b>DF</b> | <b>Value</b> | <b>Prob</b> |
|------------------------------------|-----------|--------------|-------------|
| <b>Chi-Square</b>                  | 1         | 0.6359       | 0.4252      |
| <b>Likelihood Ratio Chi-Square</b> | 1         | 0.5993       | 0.4389      |
| <b>Continuity Adj. Chi-Square</b>  | 1         | 0.3433       | 0.5579      |
| <b>Mantel-Haenszel Chi-Square</b>  | 1         | 0.6353       | 0.4254      |
| <b>Phi Coefficient</b>             |           | -0.0236      |             |
| <b>Contingency Coefficient</b>     |           | 0.0236       |             |
| <b>Cramer's V</b>                  |           | -0.0236      |             |

| <b>Fisher's Exact Test</b>      |        |
|---------------------------------|--------|
| <b>Cell (1,1) Frequency (F)</b> | 29     |
| <b>Left-sided Pr &lt;= F</b>    | 0.2701 |
| <b>Right-sided Pr &gt;= F</b>   | 0.8439 |
| <b>Table Probability (P)</b>    | 0.1140 |
| <b>Two-sided Pr &lt;= P</b>     | 0.4015 |

Effective Sample Size = 1143

Frequency Missing = 116



| Frequency<br>Col Pct           | Table of injectable_drugs by HIV_monoinfected_vs_HIV_HBV |                  |       |
|--------------------------------|----------------------------------------------------------|------------------|-------|
|                                | HIV_HBV                                                  | HIV_monoinfected | Total |
| <b>no</b>                      | 36                                                       | 1104             | 1140  |
|                                | 100.00                                                   | 99.28            |       |
| <b>yes</b>                     | 0                                                        | 8                | 8     |
|                                | 0.00                                                     | 0.72             |       |
| <b>Total</b>                   | 36                                                       | 1112             | 1148  |
| <b>Frequency Missing = 111</b> |                                                          |                  |       |

Statistics for Table of injectable\_drugs by HIV\_monoinfected\_vs\_HIV\_HBV

| Statistic                                                                                              | DF | Value  | Prob   |
|--------------------------------------------------------------------------------------------------------|----|--------|--------|
| <b>Chi-Square</b>                                                                                      | 1  | 0.2608 | 0.6096 |
| <b>Likelihood Ratio Chi-Square</b>                                                                     | 1  | 0.5116 | 0.4745 |
| <b>Continuity Adj. Chi-Square</b>                                                                      | 1  | 0.0000 | 1.0000 |
| <b>Mantel-Haenszel Chi-Square</b>                                                                      | 1  | 0.2606 | 0.6097 |
| <b>Phi Coefficient</b>                                                                                 |    | 0.0151 |        |
| <b>Contingency Coefficient</b>                                                                         |    | 0.0151 |        |
| <b>Cramer's V</b>                                                                                      |    | 0.0151 |        |
| <b>WARNING: 25% of the cells have expected counts less than 5. Chi-Square may not be a valid test.</b> |    |        |        |

| Fisher's Exact Test             |        |
|---------------------------------|--------|
| <b>Cell (1,1) Frequency (F)</b> | 36     |
| <b>Left-sided Pr &lt;= F</b>    | 1.0000 |
| <b>Right-sided Pr &gt;= F</b>   | 0.7744 |
| <b>Table Probability (P)</b>    | 0.7744 |
| <b>Two-sided Pr &lt;= P</b>     | 1.0000 |

Effective Sample Size = 1148  
Frequency Missing = 111

| Frequency<br>Col Pct          | Table of tattoo by HIV_monoinfected_vs_HIV_HBV |                  |       |
|-------------------------------|------------------------------------------------|------------------|-------|
|                               | HIV_HBV                                        | HIV_monoinfected | Total |
| <b>no</b>                     | 31<br>91.18                                    | 986<br>86.11     | 1017  |
| <b>yes</b>                    | 3<br>8.82                                      | 159<br>13.89     | 162   |
| <b>Total</b>                  | 34                                             | 1145             | 1179  |
| <b>Frequency Missing = 80</b> |                                                |                  |       |

Statistics for Table of tattoo by HIV\_monoinfected\_vs\_HIV\_HBV

| Statistic                                                                                              | DF | Value  | Prob   |
|--------------------------------------------------------------------------------------------------------|----|--------|--------|
| <b>Chi-Square</b>                                                                                      | 1  | 0.7141 | 0.3981 |
| <b>Likelihood Ratio Chi-Square</b>                                                                     | 1  | 0.8000 | 0.3711 |
| <b>Continuity Adj. Chi-Square</b>                                                                      | 1  | 0.3508 | 0.5536 |
| <b>Mantel-Haenszel Chi-Square</b>                                                                      | 1  | 0.7135 | 0.3983 |
| <b>Phi Coefficient</b>                                                                                 |    | 0.0246 |        |
| <b>Contingency Coefficient</b>                                                                         |    | 0.0246 |        |
| <b>Cramer's V</b>                                                                                      |    | 0.0246 |        |
| <b>WARNING: 25% of the cells have expected counts less than 5. Chi-Square may not be a valid test.</b> |    |        |        |

| Fisher's Exact Test             |        |
|---------------------------------|--------|
| <b>Cell (1,1) Frequency (F)</b> | 31     |
| <b>Left-sided Pr &lt;= F</b>    | 0.8681 |
| <b>Right-sided Pr &gt;= F</b>   | 0.2907 |
| <b>Table Probability (P)</b>    | 0.1588 |
| <b>Two-sided Pr &lt;= P</b>     | 0.6114 |

Effective Sample Size = 1179  
Frequency Missing = 80

*HIV\_monoinfected\_vs.\_HIV\_HCV*

The SAS System

The FREQ Procedure

| Frequency<br>Col Pct | Table of transformed_age_1 by HIV_monoinfected_vs_HIV_HCV |                  |       |
|----------------------|-----------------------------------------------------------|------------------|-------|
|                      | HIV_HCV                                                   | HIV_monoinfected | Total |
| <b>18-29</b>         | 16                                                        | 476              | 492   |
|                      | 41.02                                                     | 40.51            |       |
| <b>30-49</b>         | 17                                                        | 505              | 522   |
|                      | 43.59                                                     | 42.98            |       |
| <b>0-17</b>          | 2                                                         | 55               | 57    |
|                      | 5.13                                                      | 4.68             |       |
| <b>&gt;_50</b>       | 4                                                         | 139              | 143   |
|                      | 10.26                                                     | 11.83            |       |
| <b>Total</b>         | 39                                                        | 1175             | 1214  |
|                      | <b>Frequency Missing = 45</b>                             |                  |       |

Statistics for Table of transformed\_age\_1 by HIV\_monoinfected\_vs\_HIV\_HCV

| Statistic                                                                                              | DF | Value  | Prob   |
|--------------------------------------------------------------------------------------------------------|----|--------|--------|
| <b>Chi-Square</b>                                                                                      | 3  | 0.1012 | 0.9917 |
| <b>Likelihood Ratio Chi-Square</b>                                                                     | 3  | 0.1042 | 0.9913 |
| <b>Mantel-Haenszel Chi-Square</b>                                                                      | 1  | 0.0429 | 0.8359 |
| <b>Phi Coefficient</b>                                                                                 |    | 0.0091 |        |
| <b>Contingency Coefficient</b>                                                                         |    | 0.0091 |        |
| <b>Cramer's V</b>                                                                                      |    | 0.0091 |        |
| <b>WARNING: 25% of the cells have expected counts less than 5. Chi-Square may not be a valid test.</b> |    |        |        |

Effective Sample Size = 1214

Frequency Missing = 45

| Frequency<br>Col Pct          | Table of sex by HIV_monoinfected_vs_HIV_HCV |                  |       |
|-------------------------------|---------------------------------------------|------------------|-------|
|                               | HIV_HCV                                     | HIV_monoinfected | Total |
| <b>female</b>                 | 12                                          | 499              | 511   |
|                               | 30.77                                       | 42.32            |       |
| <b>male</b>                   | 27                                          | 680              | 707   |
|                               | 69.23                                       | 57.68            |       |
| <b>Total</b>                  | 39                                          | 1179             | 1218  |
| <b>Frequency Missing = 41</b> |                                             |                  |       |

Statistics for Table of sex by HIV\_monoinfected\_vs\_HIV\_HCV

| Statistic                          | DF | Value   | Prob   |
|------------------------------------|----|---------|--------|
| <b>Chi-Square</b>                  | 1  | 2.0697  | 0.1503 |
| <b>Likelihood Ratio Chi-Square</b> | 1  | 2.1401  | 0.1435 |
| <b>Continuity Adj. Chi-Square</b>  | 1  | 1.6224  | 0.2028 |
| <b>Mantel-Haenszel Chi-Square</b>  | 1  | 2.0680  | 0.1504 |
| <b>Phi Coefficient</b>             |    | -0.0412 |        |
| <b>Contingency Coefficient</b>     |    | 0.0412  |        |
| <b>Cramer's V</b>                  |    | -0.0412 |        |

| Fisher's Exact Test             |        |
|---------------------------------|--------|
| <b>Cell (1,1) Frequency (F)</b> | 12     |
| <b>Left-sided Pr &lt;= F</b>    | 0.1001 |
| <b>Right-sided Pr &gt;= F</b>   | 0.9477 |
| <b>Table Probability (P)</b>    | 0.0478 |
| <b>Two-sided Pr &lt;= P</b>     | 0.1870 |

Effective Sample Size = 1218

Frequency Missing = 41

| Frequency<br>Col Pct | Table of marital_status by HIV_monoinfected_vs_HIV_HCV |                  |       |
|----------------------|--------------------------------------------------------|------------------|-------|
|                      | HIV_HCV                                                | HIV_monoinfected | Total |
| <b>divorced</b>      | 2<br>5.41                                              | 100<br>8.54      | 102   |
| <b>married</b>       | 16<br>43.24                                            | 459<br>39.20     | 475   |
| <b>single</b>        | 18<br>48.65                                            | 562<br>47.99     | 580   |
| <b>widower</b>       | 1<br>2.70                                              | 50<br>4.27       | 51    |
| <b>Total</b>         | 37                                                     | 1171             | 1208  |

**Frequency Missing = 51**

Statistics for Table of marital\_status by HIV\_monoinfected\_vs\_HIV\_HCV

| Statistic                                                                                              | DF | Value  | Prob   |
|--------------------------------------------------------------------------------------------------------|----|--------|--------|
| <b>Chi-Square</b>                                                                                      | 3  | 0.7785 | 0.8546 |
| <b>Likelihood Ratio Chi-Square</b>                                                                     | 3  | 0.8634 | 0.8342 |
| <b>Mantel-Haenszel Chi-Square</b>                                                                      | 1  | 0.0031 | 0.9559 |
| <b>Phi Coefficient</b>                                                                                 |    | 0.0254 |        |
| <b>Contingency Coefficient</b>                                                                         |    | 0.0254 |        |
| <b>Cramer's V</b>                                                                                      |    | 0.0254 |        |
| <b>WARNING: 25% of the cells have expected counts less than 5. Chi-Square may not be a valid test.</b> |    |        |        |

Effective Sample Size = 1208

Frequency Missing = 51

| Frequency<br>Col Pct          | Table of ethnicity by HIV_monoinfected_vs_HIV_HCV |                  |       |
|-------------------------------|---------------------------------------------------|------------------|-------|
|                               | HIV_HCV                                           | HIV_monoinfected | Total |
| <b>black</b>                  | 0                                                 | 42               | 42    |
|                               | 0.00                                              | 3.65             |       |
| <b>brown</b>                  | 13                                                | 400              | 413   |
|                               | 35.14                                             | 34.72            |       |
| <b>other</b>                  | 0                                                 | 6                | 6     |
|                               | 0.00                                              | 0.52             |       |
| <b>white</b>                  | 24                                                | 704              | 728   |
|                               | 64.86                                             | 61.11            |       |
| <b>Total</b>                  | 37                                                | 1152             | 1189  |
| <b>Frequency Missing = 70</b> |                                                   |                  |       |

Statistics for Table of ethnicity by HIV\_monoinfected\_vs\_HIV\_HCV

| Statistic                                                                                              | DF | Value  | Prob   |
|--------------------------------------------------------------------------------------------------------|----|--------|--------|
| <b>Chi-Square</b>                                                                                      | 3  | 1.6259 | 0.6535 |
| <b>Likelihood Ratio Chi-Square</b>                                                                     | 3  | 3.1176 | 0.3739 |
| <b>Mantel-Haenszel Chi-Square</b>                                                                      | 1  | 0.3809 | 0.5371 |
| <b>Phi Coefficient</b>                                                                                 |    | 0.0370 |        |
| <b>Contingency Coefficient</b>                                                                         |    | 0.0370 |        |
| <b>Cramer's V</b>                                                                                      |    | 0.0370 |        |
| <b>WARNING: 25% of the cells have expected counts less than 5. Chi-Square may not be a valid test.</b> |    |        |        |

Effective Sample Size = 1189

Frequency Missing = 70

| Frequency<br>Col Pct          | Table of degree_level by HIV_monoinfected_vs_HIV_HCV |                  |       |
|-------------------------------|------------------------------------------------------|------------------|-------|
|                               | HIV_HCV                                              | HIV_monoinfected | Total |
| <b>≤ 8 years</b>              | 22<br>61.11                                          | 551<br>48.72     | 573   |
| <b>&gt; 8 years</b>           | 14<br>38.89                                          | 580<br>51.28     | 594   |
| <b>Total</b>                  | 36                                                   | 1131             | 1167  |
| <b>Frequency Missing = 92</b> |                                                      |                  |       |

Statistics for Table of degree\_level by HIV\_monoinfected\_vs\_HIV\_HCV

| Statistic                          | DF | Value  | Prob   |
|------------------------------------|----|--------|--------|
| <b>Chi-Square</b>                  | 1  | 2.1442 | 0.1431 |
| <b>Likelihood Ratio Chi-Square</b> | 1  | 2.1585 | 0.1418 |
| <b>Continuity Adj. Chi-Square</b>  | 1  | 1.6770 | 0.1953 |
| <b>Mantel-Haenszel Chi-Square</b>  | 1  | 2.1423 | 0.1433 |
| <b>Phi Coefficient</b>             |    | 0.0429 |        |
| <b>Contingency Coefficient</b>     |    | 0.0428 |        |
| <b>Cramer's V</b>                  |    | 0.0429 |        |

| Fisher's Exact Test             |        |
|---------------------------------|--------|
| <b>Cell (1,1) Frequency (F)</b> | 22     |
| <b>Left-sided Pr ≤ F</b>        | 0.9493 |
| <b>Right-sided Pr ≥ F</b>       | 0.0975 |
| <b>Table Probability (P)</b>    | 0.0467 |
| <b>Two-sided Pr ≤ P</b>         | 0.1755 |

Effective Sample Size = 1167

Frequency Missing = 92

| Frequency<br>Col Pct          | Table of sexual_behavior by HIV_monoinfected_vs_HIV_HCV |                  |       |
|-------------------------------|---------------------------------------------------------|------------------|-------|
|                               | HIV_HCV                                                 | HIV_monoinfected | Total |
| <b>heterosexual</b>           | 32                                                      | 880              | 912   |
|                               | 86.49                                                   | 77.13            |       |
| <b>homosexual/bisexual</b>    | 5                                                       | 261              | 266   |
|                               | 13.51                                                   | 22.87            |       |
| <b>Total</b>                  | 37                                                      | 1141             | 1178  |
| <b>Frequency Missing = 81</b> |                                                         |                  |       |

Statistics for Table of sexual\_behavior by HIV\_monoinfected\_vs\_HIV\_HCV

| Statistic                          | DF | Value  | Prob   |
|------------------------------------|----|--------|--------|
| <b>Chi-Square</b>                  | 1  | 1.7965 | 0.1801 |
| <b>Likelihood Ratio Chi-Square</b> | 1  | 2.0103 | 0.1562 |
| <b>Continuity Adj. Chi-Square</b>  | 1  | 1.3009 | 0.2541 |
| <b>Mantel-Haenszel Chi-Square</b>  | 1  | 1.7949 | 0.1803 |
| <b>Phi Coefficient</b>             |    | 0.0391 |        |
| <b>Contingency Coefficient</b>     |    | 0.0390 |        |
| <b>Cramer's V</b>                  |    | 0.0391 |        |

| Fisher's Exact Test             |        |
|---------------------------------|--------|
| <b>Cell (1,1) Frequency (F)</b> | 32     |
| <b>Left-sided Pr &lt;= F</b>    | 0.9457 |
| <b>Right-sided Pr &gt;= F</b>   | 0.1241 |
| <b>Table Probability (P)</b>    | 0.0698 |
| <b>Two-sided Pr &lt;= P</b>     | 0.2312 |

Effective Sample Size = 1178

Frequency Missing = 81



WARNING: 21% of the data are missing.

| Frequency<br>Col Pct          | Table of way_of_acquiring_virus by HIV_monoinfected_vs_HIV_HCV |                  |       |
|-------------------------------|----------------------------------------------------------------|------------------|-------|
|                               | HIV_HCV                                                        | HIV_monoinfected | Total |
| <b>OUTROS</b>                 | 0                                                              | 27               | 27    |
|                               | 0.00                                                           | 2.31             |       |
| <b>sexual</b>                 | 38                                                             | 1144             | 1182  |
|                               | 100.00                                                         | 97.69            |       |
| <b>Total</b>                  | 38                                                             | 1171             | 1209  |
| <b>Frequency Missing = 50</b> |                                                                |                  |       |

Statistics for Table of way\_of\_acquiring\_virus by HIV\_monoinfected\_vs\_HIV\_HCV

| Statistic                                                                                              | DF | Value   | Prob   |
|--------------------------------------------------------------------------------------------------------|----|---------|--------|
| <b>Chi-Square</b>                                                                                      | 1  | 0.8962  | 0.3438 |
| <b>Likelihood Ratio Chi-Square</b>                                                                     | 1  | 1.7444  | 0.1866 |
| <b>Continuity Adj. Chi-Square</b>                                                                      | 1  | 0.1513  | 0.6973 |
| <b>Mantel-Haenszel Chi-Square</b>                                                                      | 1  | 0.8954  | 0.3440 |
| <b>Phi Coefficient</b>                                                                                 |    | -0.0272 |        |
| <b>Contingency Coefficient</b>                                                                         |    | 0.0272  |        |
| <b>Cramer's V</b>                                                                                      |    | -0.0272 |        |
| <b>WARNING: 25% of the cells have expected counts less than 5. Chi-Square may not be a valid test.</b> |    |         |        |

| Fisher's Exact Test             |        |
|---------------------------------|--------|
| <b>Cell (1,1) Frequency (F)</b> | 0      |
| <b>Left-sided Pr &lt;= F</b>    | 0.4182 |
| <b>Right-sided Pr &gt;= F</b>   | 1.0000 |
| <b>Table Probability (P)</b>    | 0.4182 |
| <b>Two-sided Pr &lt;= P</b>     | 1.0000 |

Effective Sample Size = 1209

Frequency Missing = 50

| Frequency<br>Col Pct          | Table of diagnostic_period by HIV_monoinfected_vs_HIV_HCV |                  |       |
|-------------------------------|-----------------------------------------------------------|------------------|-------|
|                               | HIV_HCV                                                   | HIV_monoinfected | Total |
| > 5 years                     | 31<br>79.49                                               | 528<br>44.79     | 559   |
| 3-5 years                     | 5<br>12.82                                                | 227<br>19.25     | 232   |
| >5 years                      | 3<br>7.69                                                 | 424<br>35.96     | 427   |
| <b>Total</b>                  | 39                                                        | 1179             | 1218  |
| <b>Frequency Missing = 41</b> |                                                           |                  |       |

Statistics for Table of diagnostic\_period by HIV\_monoinfected\_vs\_HIV\_HCV

| Statistic                          | DF | Value   | Prob   |
|------------------------------------|----|---------|--------|
| <b>Chi-Square</b>                  | 2  | 19.3328 | <.0001 |
| <b>Likelihood Ratio Chi-Square</b> | 2  | 21.6126 | <.0001 |
| <b>Mantel-Haenszel Chi-Square</b>  | 1  | 18.7505 | <.0001 |
| <b>Phi Coefficient</b>             |    | 0.1260  |        |
| <b>Contingency Coefficient</b>     |    | 0.1250  |        |
| <b>Cramer's V</b>                  |    | 0.1260  |        |

Effective Sample Size = 1218  
Frequency Missing = 41

| Frequency<br>Col Pct           | Table of Alcohol by HIV_monoinfected_vs_HIV_HCV |                  |       |
|--------------------------------|-------------------------------------------------|------------------|-------|
|                                | HIV_HCV                                         | HIV_monoinfected | Total |
| <b>no</b>                      | 19<br>59.38                                     | 900<br>81.45     | 919   |
| <b>yes</b>                     | 13<br>40.63                                     | 205<br>18.55     | 218   |
| <b>Total</b>                   | 32                                              | 1105             | 1137  |
| <b>Frequency Missing = 122</b> |                                                 |                  |       |

Statistics for Table of Alcohol by HIV\_monoinfected\_vs\_HIV\_HCV

| Statistic                          | DF | Value   | Prob   |
|------------------------------------|----|---------|--------|
| <b>Chi-Square</b>                  | 1  | 9.7774  | 0.0018 |
| <b>Likelihood Ratio Chi-Square</b> | 1  | 8.0795  | 0.0045 |
| <b>Continuity Adj. Chi-Square</b>  | 1  | 8.4049  | 0.0037 |
| <b>Mantel-Haenszel Chi-Square</b>  | 1  | 9.7688  | 0.0018 |
| <b>Phi Coefficient</b>             |    | -0.0927 |        |
| <b>Contingency Coefficient</b>     |    | 0.0923  |        |
| <b>Cramer's V</b>                  |    | -0.0927 |        |

| Fisher's Exact Test             |        |
|---------------------------------|--------|
| <b>Cell (1,1) Frequency (F)</b> | 19     |
| <b>Left-sided Pr &lt;= F</b>    | 0.0037 |
| <b>Right-sided Pr &gt;= F</b>   | 0.9989 |
| <b>Table Probability (P)</b>    | 0.0026 |
| <b>Two-sided Pr &lt;= P</b>     | 0.0046 |

Effective Sample Size = 1137

Frequency Missing = 122

| Frequency<br>Col Pct           | Table of injectable_drugs by HIV_monoinfected_vs_HIV_HCV |                  |       |
|--------------------------------|----------------------------------------------------------|------------------|-------|
|                                | HIV_HCV                                                  | HIV_monoinfected | Total |
| <b>no</b>                      | 30<br>90.91                                              | 1104<br>99.28    | 1134  |
| <b>yes</b>                     | 3<br>9.09                                                | 8<br>0.72        | 11    |
| <b>Total</b>                   | 33                                                       | 1112             | 1145  |
| <b>Frequency Missing = 114</b> |                                                          |                  |       |

Statistics for Table of injectable\_drugs by HIV\_monoinfected\_vs\_HIV\_HCV

| Statistic                                                                                              | DF | Value   | Prob   |
|--------------------------------------------------------------------------------------------------------|----|---------|--------|
| <b>Chi-Square</b>                                                                                      | 1  | 23.6061 | <.0001 |
| <b>Likelihood Ratio Chi-Square</b>                                                                     | 1  | 9.0899  | 0.0026 |
| <b>Continuity Adj. Chi-Square</b>                                                                      | 1  | 15.6274 | <.0001 |
| <b>Mantel-Haenszel Chi-Square</b>                                                                      | 1  | 23.5854 | <.0001 |
| <b>Phi Coefficient</b>                                                                                 |    | -0.1436 |        |
| <b>Contingency Coefficient</b>                                                                         |    | 0.1421  |        |
| <b>Cramer's V</b>                                                                                      |    | -0.1436 |        |
| <b>WARNING: 25% of the cells have expected counts less than 5. Chi-Square may not be a valid test.</b> |    |         |        |

| Fisher's Exact Test             |        |
|---------------------------------|--------|
| <b>Cell (1,1) Frequency (F)</b> | 30     |
| <b>Left-sided Pr &lt;= F</b>    | 0.0031 |
| <b>Right-sided Pr &gt;= F</b>   | 0.9998 |
| <b>Table Probability (P)</b>    | 0.0029 |
| <b>Two-sided Pr &lt;= P</b>     | 0.0031 |

Effective Sample Size = 1145  
Frequency Missing = 114

| Frequency<br>Col Pct          | Table of tattoo by HIV_monoinfected_vs_HIV_HCV |                  |       |
|-------------------------------|------------------------------------------------|------------------|-------|
|                               | HIV_HCV                                        | HIV_monoinfected | Total |
| <b>no</b>                     | 29<br>90.63                                    | 986<br>86.11     | 1015  |
| <b>yes</b>                    | 3<br>9.38                                      | 159<br>13.89     | 162   |
| <b>Total</b>                  | 32                                             | 1145             | 1177  |
| <b>Frequency Missing = 82</b> |                                                |                  |       |

Statistics for Table of tattoo by HIV\_monoinfected\_vs\_HIV\_HCV

| Statistic                                                                                              | DF | Value  | Prob   |
|--------------------------------------------------------------------------------------------------------|----|--------|--------|
| <b>Chi-Square</b>                                                                                      | 1  | 0.5338 | 0.4650 |
| <b>Likelihood Ratio Chi-Square</b>                                                                     | 1  | 0.5896 | 0.4426 |
| <b>Continuity Adj. Chi-Square</b>                                                                      | 1  | 0.2214 | 0.6380 |
| <b>Mantel-Haenszel Chi-Square</b>                                                                      | 1  | 0.5334 | 0.4652 |
| <b>Phi Coefficient</b>                                                                                 |    | 0.0213 |        |
| <b>Contingency Coefficient</b>                                                                         |    | 0.0213 |        |
| <b>Cramer's V</b>                                                                                      |    | 0.0213 |        |
| <b>WARNING: 25% of the cells have expected counts less than 5. Chi-Square may not be a valid test.</b> |    |        |        |

| Fisher's Exact Test             |        |
|---------------------------------|--------|
| <b>Cell (1,1) Frequency (F)</b> | 29     |
| <b>Left-sided Pr &lt;= F</b>    | 0.8397 |
| <b>Right-sided Pr &gt;= F</b>   | 0.3373 |
| <b>Table Probability (P)</b>    | 0.1770 |
| <b>Two-sided Pr &lt;= P</b>     | 0.6082 |

Effective Sample Size = 1177  
Frequency Missing = 82

*HIV\_monoinfected\_vs\_Hepatitis*

The SAS System

The FREQ Procedure

| Frequency<br>Col Pct         | Table of transformed_age_1 by HIV_monoinfected_vs_Hepatitis |             |       |
|------------------------------|-------------------------------------------------------------|-------------|-------|
|                              | HIV_monoinfected                                            | Hepatitis   | Total |
| <b>18-29</b>                 | 476<br>40.51                                                | 26<br>32.50 | 502   |
| <b>30-49</b>                 | 505<br>42.98                                                | 42<br>52.50 | 547   |
| <b>0-17</b>                  | 55<br>4.68                                                  | 2<br>2.50   | 57    |
| <b>&gt;_50</b>               | 139<br>11.83                                                | 10<br>12.50 | 149   |
| <b>Total</b>                 | 1175                                                        | 80          | 1255  |
| <b>Frequency Missing = 4</b> |                                                             |             |       |

Statistics for Table of transformed\_age\_1 by HIV\_monoinfected\_vs\_Hepatitis

| Statistic                          | DF | Value  | Prob   |
|------------------------------------|----|--------|--------|
| <b>Chi-Square</b>                  | 3  | 3.5721 | 0.3115 |
| <b>Likelihood Ratio Chi-Square</b> | 3  | 3.7031 | 0.2954 |
| <b>Mantel-Haenszel Chi-Square</b>  | 1  | 0.4244 | 0.5147 |
| <b>Phi Coefficient</b>             |    | 0.0534 |        |
| <b>Contingency Coefficient</b>     |    | 0.0533 |        |
| <b>Cramer's V</b>                  |    | 0.0534 |        |

Effective Sample Size = 1255

Frequency Missing = 4

| Frequency<br>Col Pct | Table of sex by HIV_monoinfected_vs_Hepatitis |           |       |
|----------------------|-----------------------------------------------|-----------|-------|
|                      | HIV_monoinfected                              | Hepatitis | Total |
| <b>female</b>        | 499                                           | 29        | 528   |
|                      | 42.32                                         | 36.25     |       |
| <b>male</b>          | 680                                           | 51        | 731   |
|                      | 57.68                                         | 63.75     |       |
| <b>Total</b>         | 1179                                          | 80        | 1259  |

Statistics for Table of sex by HIV\_monoinfected\_vs\_Hepatitis

| Statistic                          | DF | Value  | Prob   |
|------------------------------------|----|--------|--------|
| <b>Chi-Square</b>                  | 1  | 1.1351 | 0.2867 |
| <b>Likelihood Ratio Chi-Square</b> | 1  | 1.1511 | 0.2833 |
| <b>Continuity Adj. Chi-Square</b>  | 1  | 0.8993 | 0.3430 |
| <b>Mantel-Haenszel Chi-Square</b>  | 1  | 1.1342 | 0.2869 |
| <b>Phi Coefficient</b>             |    | 0.0300 |        |
| <b>Contingency Coefficient</b>     |    | 0.0300 |        |
| <b>Cramer's V</b>                  |    | 0.0300 |        |

| Fisher's Exact Test             |        |
|---------------------------------|--------|
| <b>Cell (1,1) Frequency (F)</b> | 499    |
| <b>Left-sided Pr &lt;= F</b>    | 0.8820 |
| <b>Right-sided Pr &gt;= F</b>   | 0.1716 |
| <b>Table Probability (P)</b>    | 0.0537 |
| <b>Two-sided Pr &lt;= P</b>     | 0.2952 |

Sample Size = 1259

| Frequency<br>Col Pct          | Table of marital_status by HIV_monoinfected_vs_Hepatitis |           |       |
|-------------------------------|----------------------------------------------------------|-----------|-------|
|                               | HIV_monoinfected                                         | Hepatitis | Total |
| <b>divorced</b>               | 100                                                      | 6         | 106   |
|                               | 8.54                                                     | 7.79      |       |
| <b>married</b>                | 459                                                      | 34        | 493   |
|                               | 39.20                                                    | 44.16     |       |
| <b>single</b>                 | 562                                                      | 36        | 598   |
|                               | 47.99                                                    | 46.75     |       |
| <b>widower</b>                | 50                                                       | 1         | 51    |
|                               | 4.27                                                     | 1.30      |       |
| <b>Total</b>                  | 1171                                                     | 77        | 1248  |
| <b>Frequency Missing = 11</b> |                                                          |           |       |

Statistics for Table of marital\_status by HIV\_monoinfected\_vs\_Hepatitis

| Statistic                          | DF | Value  | Prob   |
|------------------------------------|----|--------|--------|
| <b>Chi-Square</b>                  | 3  | 2.0811 | 0.5557 |
| <b>Likelihood Ratio Chi-Square</b> | 3  | 2.6018 | 0.4572 |
| <b>Mantel-Haenszel Chi-Square</b>  | 1  | 0.5966 | 0.4399 |
| <b>Phi Coefficient</b>             |    | 0.0408 |        |
| <b>Contingency Coefficient</b>     |    | 0.0408 |        |
| <b>Cramer's V</b>                  |    | 0.0408 |        |

Effective Sample Size = 1248

Frequency Missing = 11



| Frequency<br>Col Pct          | Table of ethnicity by HIV_monoinfected_vs_Hepatitis |           |       |
|-------------------------------|-----------------------------------------------------|-----------|-------|
|                               | HIV_monoinfected                                    | Hepatitis | Total |
| <b>black</b>                  | 42                                                  | 2         | 44    |
|                               | 3.65                                                | 2.67      |       |
| <b>brown</b>                  | 400                                                 | 28        | 428   |
|                               | 34.72                                               | 37.33     |       |
| <b>other</b>                  | 6                                                   | 0         | 6     |
|                               | 0.52                                                | 0.00      |       |
| <b>white</b>                  | 704                                                 | 45        | 749   |
|                               | 61.11                                               | 60.00     |       |
| <b>Total</b>                  | 1152                                                | 75        | 1227  |
| <b>Frequency Missing = 32</b> |                                                     |           |       |

Statistics for Table of ethnicity by HIV\_monoinfected\_vs\_Hepatitis

| Statistic                                                                                              | DF | Value  | Prob   |
|--------------------------------------------------------------------------------------------------------|----|--------|--------|
| <b>Chi-Square</b>                                                                                      | 3  | 0.7308 | 0.8659 |
| <b>Likelihood Ratio Chi-Square</b>                                                                     | 3  | 1.1115 | 0.7743 |
| <b>Mantel-Haenszel Chi-Square</b>                                                                      | 1  | 0.0205 | 0.8861 |
| <b>Phi Coefficient</b>                                                                                 |    | 0.0244 |        |
| <b>Contingency Coefficient</b>                                                                         |    | 0.0244 |        |
| <b>Cramer's V</b>                                                                                      |    | 0.0244 |        |
| <b>WARNING: 25% of the cells have expected counts less than 5. Chi-Square may not be a valid test.</b> |    |        |        |

Effective Sample Size = 1227

Frequency Missing = 32

| Frequency<br>Col Pct          | Table of degree_level by HIV_monoinfected_vs_Hepatitis |             |       |
|-------------------------------|--------------------------------------------------------|-------------|-------|
|                               | HIV_monoinfected                                       | Hepatitis   | Total |
| $\leq 8$ years                | 551<br>48.72                                           | 48<br>64.00 | 599   |
| $> 8$ years                   | 580<br>51.28                                           | 27<br>36.00 | 607   |
| <b>Total</b>                  | 1131                                                   | 75          | 1206  |
| <b>Frequency Missing = 53</b> |                                                        |             |       |

Statistics for Table of degree\_level by HIV\_monoinfected\_vs\_Hepatitis

| Statistic                          | DF | Value   | Prob   |
|------------------------------------|----|---------|--------|
| <b>Chi-Square</b>                  | 1  | 6.5708  | 0.0104 |
| <b>Likelihood Ratio Chi-Square</b> | 1  | 6.6500  | 0.0099 |
| <b>Continuity Adj. Chi-Square</b>  | 1  | 5.9737  | 0.0145 |
| <b>Mantel-Haenszel Chi-Square</b>  | 1  | 6.5654  | 0.0104 |
| <b>Phi Coefficient</b>             |    | -0.0738 |        |
| <b>Contingency Coefficient</b>     |    | 0.0736  |        |
| <b>Cramer's V</b>                  |    | -0.0738 |        |

| Fisher's Exact Test                       |        |
|-------------------------------------------|--------|
| <b>Cell (1,1) Frequency (F)</b>           | 551    |
| <b>Left-sided Pr <math>\leq F</math></b>  | 0.0070 |
| <b>Right-sided Pr <math>\geq F</math></b> | 0.9965 |
| <b>Table Probability (P)</b>              | 0.0036 |
| <b>Two-sided Pr <math>\leq P</math></b>   | 0.0120 |

Effective Sample Size = 1206

Frequency Missing = 53

| Frequency<br>Col Pct          | Table of sexual_behavior by HIV_monoinfected_vs_Hepatitis |           |       |
|-------------------------------|-----------------------------------------------------------|-----------|-------|
|                               | HIV_monoinfected                                          | Hepatitis | Total |
| <b>heterosexual</b>           | 880                                                       | 66        | 946   |
|                               | 77.13                                                     | 86.84     |       |
| <b>homosexual/bisexual</b>    | 261                                                       | 10        | 271   |
|                               | 22.87                                                     | 13.16     |       |
| <b>Total</b>                  | 1141                                                      | 76        | 1217  |
| <b>Frequency Missing = 42</b> |                                                           |           |       |

Statistics for Table of sexual\_behavior by HIV\_monoinfected\_vs\_Hepatitis

| Statistic                          | DF | Value   | Prob   |
|------------------------------------|----|---------|--------|
| <b>Chi-Square</b>                  | 1  | 3.8866  | 0.0487 |
| <b>Likelihood Ratio Chi-Square</b> | 1  | 4.3473  | 0.0371 |
| <b>Continuity Adj. Chi-Square</b>  | 1  | 3.3455  | 0.0674 |
| <b>Mantel-Haenszel Chi-Square</b>  | 1  | 3.8834  | 0.0488 |
| <b>Phi Coefficient</b>             |    | -0.0565 |        |
| <b>Contingency Coefficient</b>     |    | 0.0564  |        |
| <b>Cramer's V</b>                  |    | -0.0565 |        |

| Fisher's Exact Test             |        |
|---------------------------------|--------|
| <b>Cell (1,1) Frequency (F)</b> | 880    |
| <b>Left-sided Pr &lt;= F</b>    | 0.0289 |
| <b>Right-sided Pr &gt;= F</b>   | 0.9868 |
| <b>Table Probability (P)</b>    | 0.0156 |
| <b>Two-sided Pr &lt;= P</b>     | 0.0472 |

Effective Sample Size = 1217

Frequency Missing = 42

WARNING: 18% of the data are missing.

| Frequency<br>Col Pct          | Table of way_of_acquiring_virus by HIV_monoinfected_vs_Hepatitis |           |       |
|-------------------------------|------------------------------------------------------------------|-----------|-------|
|                               | HIV_monoinfected                                                 | Hepatitis | Total |
| <b>OUTROS</b>                 | 27                                                               | 0         | 27    |
|                               | 2.31                                                             | 0.00      |       |
| <b>sexual</b>                 | 1144                                                             | 78        | 1222  |
|                               | 97.69                                                            | 100.00    |       |
| <b>Total</b>                  | 1171                                                             | 78        | 1249  |
| <b>Frequency Missing = 10</b> |                                                                  |           |       |

Statistics for Table of way\_of\_acquiring\_virus by HIV\_monoinfected\_vs\_Hepatitis

| Statistic                                                                                              | DF | Value  | Prob   |
|--------------------------------------------------------------------------------------------------------|----|--------|--------|
| <b>Chi-Square</b>                                                                                      | 1  | 1.8382 | 0.1752 |
| <b>Likelihood Ratio Chi-Square</b>                                                                     | 1  | 3.5217 | 0.0606 |
| <b>Continuity Adj. Chi-Square</b>                                                                      | 1  | 0.9097 | 0.3402 |
| <b>Mantel-Haenszel Chi-Square</b>                                                                      | 1  | 1.8367 | 0.1753 |
| <b>Phi Coefficient</b>                                                                                 |    | 0.0384 |        |
| <b>Contingency Coefficient</b>                                                                         |    | 0.0383 |        |
| <b>Cramer's V</b>                                                                                      |    | 0.0384 |        |
| <b>WARNING: 25% of the cells have expected counts less than 5. Chi-Square may not be a valid test.</b> |    |        |        |

| Fisher's Exact Test             |        |
|---------------------------------|--------|
| <b>Cell (1,1) Frequency (F)</b> | 27     |
| <b>Left-sided Pr &lt;= F</b>    | 1.0000 |
| <b>Right-sided Pr &gt;= F</b>   | 0.1720 |
| <b>Table Probability (P)</b>    | 0.1720 |
| <b>Two-sided Pr &lt;= P</b>     | 0.4072 |

Effective Sample Size = 1249

Frequency Missing = 10

| Frequency<br>Col Pct | Table of _diagnostic_period by HIV_monoinfected_vs_Hepatitis |             |             |
|----------------------|--------------------------------------------------------------|-------------|-------------|
|                      | HIV_monoinfected                                             | Hepatitis   | Total       |
| > 5 years            | 528<br>44.78                                                 | 54<br>67.50 | 582         |
| 3-5 years            | 227<br>19.25                                                 | 12<br>15.00 | 239         |
| < 3 years            | 424<br>35.96                                                 | 14<br>17.50 | 438         |
| <b>Total</b>         | <b>1179</b>                                                  | <b>80</b>   | <b>1259</b> |

Statistics for Table of transformed\_diagnostic\_period by HIV\_monoinfected\_vs\_Hepatitis

| Statistic                          | DF | Value   | Prob   |
|------------------------------------|----|---------|--------|
| <b>Chi-Square</b>                  | 2  | 16.4173 | 0.0003 |
| <b>Likelihood Ratio Chi-Square</b> | 2  | 17.0364 | 0.0002 |
| <b>Mantel-Haenszel Chi-Square</b>  | 1  | 15.9250 | <.0001 |
| <b>Phi Coefficient</b>             |    | 0.1142  |        |
| <b>Contingency Coefficient</b>     |    | 0.1135  |        |
| <b>Cramer's V</b>                  |    | 0.1142  |        |

Sample Size = 1259

| Frequency<br>Col Pct | Table of Alcohol by HIV_monoinfected_vs_Hepatitis |             |       |
|----------------------|---------------------------------------------------|-------------|-------|
|                      | HIV_monoinfected                                  | Hepatitis   | Total |
| <b>no</b>            | 900<br>81.45                                      | 50<br>69.44 | 950   |
| <b>yes</b>           | 205<br>18.55                                      | 22<br>30.56 | 227   |
| <b>Total</b>         | 1105                                              | 72          | 1177  |

**Frequency Missing = 82**

Statistics for Table of Alcohol by HIV\_monoinfected\_vs\_Hepatitis

| Statistic                          | DF | Value  | Prob   |
|------------------------------------|----|--------|--------|
| <b>Chi-Square</b>                  | 1  | 6.2566 | 0.0124 |
| <b>Likelihood Ratio Chi-Square</b> | 1  | 5.5950 | 0.0180 |
| <b>Continuity Adj. Chi-Square</b>  | 1  | 5.5093 | 0.0189 |
| <b>Mantel-Haenszel Chi-Square</b>  | 1  | 6.2513 | 0.0124 |
| <b>Phi Coefficient</b>             |    | 0.0729 |        |
| <b>Contingency Coefficient</b>     |    | 0.0727 |        |
| <b>Cramer's V</b>                  |    | 0.0729 |        |

| Fisher's Exact Test             |        |
|---------------------------------|--------|
| <b>Cell (1,1) Frequency (F)</b> | 900    |
| <b>Left-sided Pr &lt;= F</b>    | 0.9943 |
| <b>Right-sided Pr &gt;= F</b>   | 0.0122 |
| <b>Table Probability (P)</b>    | 0.0065 |
| <b>Two-sided Pr &lt;= P</b>     | 0.0196 |

Effective Sample Size = 1177

Frequency Missing = 82

| Frequency<br>Col Pct | Table of injectable_drugs by HIV_monoinfected_vs_Hepatitis |             |       |
|----------------------|------------------------------------------------------------|-------------|-------|
|                      | HIV_monoinfected                                           | Hepatitis   | Total |
| <b>no</b>            | 1104<br>99.28                                              | 68<br>95.77 | 1172  |
| <b>yes</b>           | 8<br>0.72                                                  | 3<br>4.23   | 11    |
| <b>Total</b>         | 1112                                                       | 71          | 1183  |

**Frequency Missing = 76**

Statistics for Table of injectable\_drugs by HIV\_monoinfected\_vs\_Hepatitis

| Statistic                          | DF | Value  | Prob   |
|------------------------------------|----|--------|--------|
| <b>Chi-Square</b>                  | 1  | 8.9050 | 0.0028 |
| <b>Likelihood Ratio Chi-Square</b> | 1  | 5.0618 | 0.0245 |
| <b>Continuity Adj. Chi-Square</b>  | 1  | 5.5058 | 0.0190 |
| <b>Mantel-Haenszel Chi-Square</b>  | 1  | 8.8975 | 0.0029 |
| <b>Phi Coefficient</b>             |    | 0.0868 |        |
| <b>Contingency Coefficient</b>     |    | 0.0864 |        |
| <b>Cramer's V</b>                  |    | 0.0868 |        |

**WARNING: 25% of the cells have expected counts less than 5. Chi-Square may not be a valid test.**

| Fisher's Exact Test             |        |
|---------------------------------|--------|
| <b>Cell (1,1) Frequency (F)</b> | 1104   |
| <b>Left-sided Pr &lt;= F</b>    | 0.9971 |
| <b>Right-sided Pr &gt;= F</b>   | 0.0241 |
| <b>Table Probability (P)</b>    | 0.0213 |
| <b>Two-sided Pr &lt;= P</b>     | 0.0241 |

Effective Sample Size = 1183  
Frequency Missing = 76

| Frequency<br>Col Pct          | Table of tattoo by HIV_monoinfected_vs_Hepatitis |             |       |
|-------------------------------|--------------------------------------------------|-------------|-------|
|                               | HIV_monoinfected                                 | Hepatitis   | Total |
| <b>no</b>                     | 986<br>86.11                                     | 62<br>91.18 | 1048  |
| <b>yes</b>                    | 159<br>13.89                                     | 6<br>8.82   | 165   |
| <b>Total</b>                  | 1145                                             | 68          | 1213  |
| <b>Frequency Missing = 46</b> |                                                  |             |       |

Statistics for Table of tattoo by HIV\_monoinfected\_vs\_Hepatitis

| Statistic                          | DF | Value   | Prob   |
|------------------------------------|----|---------|--------|
| <b>Chi-Square</b>                  | 1  | 1.4000  | 0.2367 |
| <b>Likelihood Ratio Chi-Square</b> | 1  | 1.5601  | 0.2117 |
| <b>Continuity Adj. Chi-Square</b>  | 1  | 1.0024  | 0.3167 |
| <b>Mantel-Haenszel Chi-Square</b>  | 1  | 1.3989  | 0.2369 |
| <b>Phi Coefficient</b>             |    | -0.0340 |        |
| <b>Contingency Coefficient</b>     |    | 0.0340  |        |
| <b>Cramer's V</b>                  |    | -0.0340 |        |

| Fisher's Exact Test             |        |
|---------------------------------|--------|
| <b>Cell (1,1) Frequency (F)</b> | 986    |
| <b>Left-sided Pr &lt;= F</b>    | 0.1579 |
| <b>Right-sided Pr &gt;= F</b>   | 0.9208 |
| <b>Table Probability (P)</b>    | 0.0787 |
| <b>Two-sided Pr &lt;= P</b>     | 0.2784 |

Effective Sample Size = 1213

Frequency Missing = 46



The FREQ Procedure

HIV\_monoinfected

| <b>HIV_monoinfected</b> |                  |                |                                 |                               |
|-------------------------|------------------|----------------|---------------------------------|-------------------------------|
| <b>HIV_monoinfected</b> | <b>Frequency</b> | <b>Percent</b> | <b>Cumulative<br/>Frequency</b> | <b>Cumulative<br/>Percent</b> |
| <b>HIV_monoinfected</b> | 1179             | 100.00         | 1179                            | 100.00                        |

| <b>anti_HBs</b>     |                  |                |                                 |                               |
|---------------------|------------------|----------------|---------------------------------|-------------------------------|
| <b>anti_HBs</b>     | <b>Frequency</b> | <b>Percent</b> | <b>Cumulative<br/>Frequency</b> | <b>Cumulative<br/>Percent</b> |
| <b>non_reactive</b> | 605              | 53.73          | 605                             | 53.73                         |
| <b>reagent</b>      | 521              | 46.27          | 1126                            | 100.00                        |

| <b>anti_HBC</b>     |                  |                |                                 |                               |
|---------------------|------------------|----------------|---------------------------------|-------------------------------|
| <b>anti_HBC</b>     | <b>Frequency</b> | <b>Percent</b> | <b>Cumulative<br/>Frequency</b> | <b>Cumulative<br/>Percent</b> |
| <b>non_reactive</b> | 900              | 83.26          | 900                             | 83.26                         |
| <b>reagent</b>      | 181              | 16.74          | 1181                            | 100.00                        |

Frequency Missing = 108

The SAS System

The FREQ Procedure

HIV\_HCV=reagent

| <b>HIV_HCV</b> |                  |                |                                 |                               |
|----------------|------------------|----------------|---------------------------------|-------------------------------|
| <b>HIV_HCV</b> | <b>Frequency</b> | <b>Percent</b> | <b>Cumulative<br/>Frequency</b> | <b>Cumulative<br/>Percent</b> |
| <b>reagent</b> | 39               | 100.00         | 39                              | 100.00                        |

| <b>anti_HBs</b>     |                  |                |                                 |                               |
|---------------------|------------------|----------------|---------------------------------|-------------------------------|
| <b>anti_HBs</b>     | <b>Frequency</b> | <b>Percent</b> | <b>Cumulative<br/>Frequency</b> | <b>Cumulative<br/>Percent</b> |
| <b>non_reactive</b> | 22               | 68.75          | 22                              | 68.75                         |
| <b>reagent</b>      | 10               | 31.25          | 32                              | 100.00                        |

| <b>anti_HBC</b>     |                  |                |                             |                           |
|---------------------|------------------|----------------|-----------------------------|---------------------------|
| <b>anti_HBC</b>     | <b>Frequency</b> | <b>Percent</b> | <b>Cumulative Frequency</b> | <b>Cumulative Percent</b> |
| <b>non_reactive</b> | 25               | 78.24          | 25                          | 78.24                     |
| <b>reagent</b>      | 7                | 21.86          | 32                          | 100.00                    |

The SAS System

The UNIVARIATE Procedure

Variable: cd4\_diagnosis (cd4\_diagnosis) HIV\_monoinfected\_female

| <b>Moments</b>       |          |                    |          |
|----------------------|----------|--------------------|----------|
| <b>N</b>             | 476      | <b>Sum Weights</b> | 476      |
| <b>Mean</b>          | 503.2164 |                    |          |
| <b>Std Deviation</b> | 333.5076 | <b>Variance</b>    | 111227.3 |
| <b>Skewness</b>      | 1.188964 | <b>Kurtosis</b>    | 5.550357 |

| <b>Quantiles (Definition 5)</b> |                 |
|---------------------------------|-----------------|
| <b>Quantile</b>                 | <b>Estimate</b> |
| <b>100% Max</b>                 | 1636            |
| <b>99%</b>                      | 1636            |
| <b>95%</b>                      | 1115            |
| <b>90%</b>                      | 894             |
| <b>75% Q3</b>                   | 688.5           |
| <b>50% Median</b>               | 450.5           |
| <b>25% Q1</b>                   | 265.5           |
| <b>10%</b>                      | 120             |
| <b>5%</b>                       | 62              |
| <b>1%</b>                       | 20              |

The SAS System

The UNIVARIATE Procedure

Variable: cd4\_diagnosis (cd4\_diagnosis) HIV\_monoinfected\_male

| <b>Moments</b> |          |                    |     |
|----------------|----------|--------------------|-----|
| <b>N</b>       | 627      | <b>Sum Weights</b> | 627 |
| <b>Mean</b>    | 408.7177 |                    |     |

| <b>Moments</b>       |          |                 |          |
|----------------------|----------|-----------------|----------|
| <b>Std Deviation</b> | 269.8876 | <b>Variance</b> | 72839.32 |
| <b>Skewness</b>      | 1.136779 | <b>Kurtosis</b> | 5.630798 |

| <b>Quantiles (Definition 5)</b> |                 |
|---------------------------------|-----------------|
| <b>Quantile</b>                 | <b>Estimate</b> |
| <b>100% Max</b>                 | 1248            |
| <b>99%</b>                      | 1248            |
| <b>95%</b>                      | 918             |
| <b>90%</b>                      | 764             |
| <b>75% Q3</b>                   | 538             |
| <b>50% Median</b>               | 379             |
| <b>25% Q1</b>                   | 213             |
| <b>10%</b>                      | 91              |
| <b>5%</b>                       | 43              |
| <b>1%</b>                       | 9               |

| <b>Wilcoxon Scores (Rank Sums) for Variable cd4_diagnosis (cd4_diagnosis) Classified by Variable HIV_monoinfected female vs male</b> |          |                      |
|--------------------------------------------------------------------------------------------------------------------------------------|----------|----------------------|
| <b>female vs male</b>                                                                                                                | <b>N</b> | <b>Sum of Scores</b> |
| <b>female</b>                                                                                                                        | 476      | 476                  |
| <b>male</b>                                                                                                                          | 627      | 627                  |

| <b>Wilcoxon Two-Sample Test</b> |           |
|---------------------------------|-----------|
| <b>Statistic</b>                |           |
| <b>U</b>                        | 124944.00 |
| <b>Z</b>                        | 4.6340    |
| <b>One-Sided Pr &lt; Z</b>      | <0.0001   |
| <b>Two-Sided Pr &gt;  Z </b>    | <0.0001   |

The SAS System  
The UNIVARIATE Procedure  
Variable: cd4\_diagnosis (cd4\_diagnosis) HIV\_HBV\_female

| <b>Moments</b>       |          |                    |          |
|----------------------|----------|--------------------|----------|
| <b>N</b>             | 16       | <b>Sum Weights</b> | 16       |
| <b>Mean</b>          | 504.6875 |                    |          |
| <b>Std Deviation</b> | 223.0048 | <b>Variance</b>    | 49731.16 |
| <b>Skewness</b>      | 1.231659 | <b>Kurtosis</b>    | 5.26303  |

| <b>Quantiles (Definition 5)</b> |                 |
|---------------------------------|-----------------|
| <b>Quantile</b>                 | <b>Estimate</b> |
| <b>100% Max</b>                 | 1138            |
| <b>99%</b>                      | 1138            |
| <b>95%</b>                      | 1138            |
| <b>90%</b>                      | 718             |
| <b>75% Q3</b>                   | 590.5           |
| <b>50% Median</b>               | 475             |
| <b>25% Q1</b>                   | 383.5           |
| <b>10%</b>                      | 257             |
| <b>5%</b>                       | 161             |
| <b>1%</b>                       | 161             |

The SAS System

The UNIVARIATE Procedure

Variable: cd4\_diagnosis (cd4\_diagnosis) HIV\_HBV\_male

| <b>Moments</b>       |           |                    |          |
|----------------------|-----------|--------------------|----------|
| <b>N</b>             | 21        | <b>Sum Weights</b> | 21       |
| <b>Mean</b>          | 376.1905  |                    |          |
| <b>Std Deviation</b> | 214.5259  | <b>Variance</b>    | 46021.36 |
| <b>Skewness</b>      | 0.7132155 | <b>Kurtosis</b>    | 3.619756 |

| <b>Quantiles (Definition 5)</b> |                 |
|---------------------------------|-----------------|
| <b>Quantile</b>                 | <b>Estimate</b> |
| <b>100% Max</b>                 | 938             |
| <b>99%</b>                      | 938             |
| <b>95%</b>                      | 701             |
| <b>90%</b>                      | 638             |
| <b>75% Q3</b>                   | 477             |
| <b>50% Median</b>               | 336             |

| <b>Quantiles (Definition 5)</b> |                 |
|---------------------------------|-----------------|
| <b>Quantile</b>                 | <b>Estimate</b> |
| <b>25% Q1</b>                   | 258             |
| <b>10%</b>                      | 156             |
| <b>5%</b>                       | 74              |
| <b>1%</b>                       | 17              |

| <b>Wilcoxon Scores (Rank Sums) for Variable cd4_diagnosis (cd4_diagnosis) Classified by Variable HIV_HBV female vs male</b> |          |                      |
|-----------------------------------------------------------------------------------------------------------------------------|----------|----------------------|
| <b>female vs male</b>                                                                                                       | <b>N</b> | <b>Sum of Scores</b> |
| <b>Female</b>                                                                                                               | 16       | 16                   |
| <b>male</b>                                                                                                                 | 21       | 21                   |

| <b>Wilcoxon Two-Sample Test</b> |        |
|---------------------------------|--------|
| <b>Statistic</b>                |        |
| <b>U</b>                        | 108.00 |
| <b>Z</b>                        | 1.8394 |
| <b>One-Sided Pr &lt; Z</b>      | 0.0329 |
| <b>Two-Sided Pr &gt;  Z </b>    | 0.0659 |

The SAS System

The UNIVARIATE Procedure

Variable: cd4\_diagnosis (cd4\_diagnosis) HIV\_HCV\_female

| <b>Moments</b>       |           |                    |           |
|----------------------|-----------|--------------------|-----------|
| <b>N</b>             | <b>11</b> | <b>Sum Weights</b> | <b>11</b> |
| <b>Mean</b>          | 360.2727  |                    |           |
| <b>Std Deviation</b> | 184.5487  | <b>Variance</b>    | 34058.22  |
| <b>Skewness</b>      | 0.1671016 | <b>Kurtosis</b>    | 1.675045  |

| <b>Quantiles (Definition 5)</b> |                 |
|---------------------------------|-----------------|
| <b>Quantile</b>                 | <b>Estimate</b> |
| <b>100% Max</b>                 | 666             |
| <b>99%</b>                      | 666             |
| <b>95%</b>                      | 666             |

| <b>Quantiles (Definition 5)</b> |                 |
|---------------------------------|-----------------|
| <b>Quantile</b>                 | <b>Estimate</b> |
| <b>90%</b>                      | 568             |
| <b>75% Q3</b>                   | 506             |
| <b>50% Median</b>               | 410             |
| <b>25% Q1</b>                   | 185             |
| <b>10%</b>                      | 141             |
| <b>5%</b>                       | 134             |
| <b>1%</b>                       | 134             |

The SAS System

The UNIVARIATE Procedure

Variable: cd4\_diagnosis (cd4\_diagnosis) HIV\_HCV\_male

| <b>Moments</b>       |          |                    |          |
|----------------------|----------|--------------------|----------|
| <b>N</b>             | 25       | <b>Sum Weights</b> | 25       |
| <b>Mean</b>          | 421.15   |                    |          |
| <b>Std Deviation</b> | 249.9246 | <b>Variance</b>    | 62462.31 |
| <b>Skewness</b>      | 1.359291 | <b>Kurtosis</b>    | 5.100264 |

| <b>Quantiles (Definition 5)</b> |                 |
|---------------------------------|-----------------|
| <b>Quantile</b>                 | <b>Estimate</b> |
| <b>100% Max</b>                 | 1211            |
| <b>99%</b>                      | 1211            |
| <b>95%</b>                      | 815             |
| <b>90%</b>                      | 726             |
| <b>75% Q3</b>                   | 522             |
| <b>50% Median</b>               | 345             |
| <b>25% Q1</b>                   | 243             |
| <b>10%</b>                      | 154             |
| <b>5%</b>                       | 147             |
| <b>1%</b>                       | 98              |

**Wilcoxon Scores (Rank Sums) for Variable cd4\_diagnosis (cd4\_diagnosis) Classified by Variable HIV\_HCV female vs male**

| female vs male | N  | Sum of Scores |
|----------------|----|---------------|
| female         | 11 | 11            |
| male           | 25 | 25            |

**Wilcoxon Two-Sample Test**

**Statistic**

|                              |        |
|------------------------------|--------|
| <b>U</b>                     | 119    |
| <b>Z</b>                     | 0.6353 |
| <b>One-Sided Pr &lt; Z</b>   | 0.2626 |
| <b>Two-Sided Pr &gt;  Z </b> | 0.5252 |

The SAS System

The UNIVARIATE Procedure

Variable: cd4\_diagnosis (cd4\_diagnosis) All\_cd4 ≤ 18\_age

**Moments**

|                      |          |                    |          |
|----------------------|----------|--------------------|----------|
| <b>N</b>             | 71       | <b>Sum Weights</b> | 71       |
| <b>Mean</b>          | 660.0423 |                    |          |
| <b>Std Deviation</b> | 379.138  | <b>Variance</b>    | 143745.6 |
| <b>Skewness</b>      | 1.312528 | <b>Kurtosis</b>    | 4.967981 |

**Quantiles (Definition 5)**

| Quantile          | Estimate |
|-------------------|----------|
| <b>100% Max</b>   | 2001     |
| <b>99%</b>        | 2001     |
| <b>95%</b>        | 1402     |
| <b>90%</b>        | 1175     |
| <b>75% Q3</b>     | 764      |
| <b>50% Median</b> | 582      |
| <b>25% Q1</b>     | 423      |
| <b>10%</b>        | 265      |
| <b>5%</b>         | 156      |
| <b>1%</b>         | 97       |

The SAS System

The UNIVARIATE Procedure

Variable: cd4\_diagnosis (cd4\_diagnosis) All\_cd4  $\geq$  50\_age

| <b>Moments</b>       |          |                    |          |
|----------------------|----------|--------------------|----------|
| <b>N</b>             | 139      | <b>Sum Weights</b> | 139      |
| <b>Mean</b>          | 374.3094 |                    |          |
| <b>Std Deviation</b> | 263.7228 | <b>Variance</b>    | 69549.71 |
| <b>Skewness</b>      | 1.321624 | <b>Kurtosis</b>    | 5.486856 |

| <b>Quantiles (Definition 5)</b> |                 |
|---------------------------------|-----------------|
| <b>Quantile</b>                 | <b>Estimate</b> |
| <b>100% Max</b>                 | 1361            |
| <b>99%</b>                      | 1361            |
| <b>95%</b>                      | 838             |
| <b>90%</b>                      | 756             |
| <b>75% Q3</b>                   | 507             |
| <b>50% Median</b>               | 333             |
| <b>25% Q1</b>                   | 168             |
| <b>10%</b>                      | 97              |
| <b>5%</b>                       | 54              |
| <b>1%</b>                       | 20              |

| <b>Wilcoxon Scores (Rank Sums) for Variable cd4_diagnosis (cd4_diagnosis) Classified by Variable All <math>\leq</math> 18_age_vs <math>\geq</math> 50_age</b> |          |                      |
|---------------------------------------------------------------------------------------------------------------------------------------------------------------|----------|----------------------|
| <b><math>\leq</math> 18_age_vs <math>\geq</math> 50_age</b>                                                                                                   | <b>N</b> | <b>Sum of Scores</b> |
| <b><math>\leq</math> 18_age</b>                                                                                                                               | 71       | 71                   |
| <b><math>\geq</math> 50_age</b>                                                                                                                               | 139      | 139                  |

| <b>Wilcoxon Two-Sample Test</b> |         |
|---------------------------------|---------|
| <b>Statistic</b>                |         |
| <b>U</b>                        | 2447.50 |
| <b>Z</b>                        | 5.9702  |
| <b>One-Sided Pr &lt; Z</b>      | <0.0001 |
| <b>Two-Sided Pr &gt;  Z </b>    | <0.0001 |



**Table 3.** CD4+ T-cell count and HIV viral load and their association with HBV and HCV in HIV-infected patients at baseline

The SAS System

| Frequency<br>Col Pct           | Table of cd4_diagnosis_transformed by HIV_monoinfected_vs_HIV_HBV |                  |       |
|--------------------------------|-------------------------------------------------------------------|------------------|-------|
|                                | HIV_HBV                                                           | HIV_monoinfected | Total |
| <b>200-500</b>                 | 20<br>54.06                                                       | 473<br>42.88     | 493   |
| <b>&lt;200</b>                 | 5<br>13.51                                                        | 232<br>21.03     | 237   |
| <b>&gt;500</b>                 | 12<br>32.43                                                       | 398<br>36.08     | 410   |
| <b>Total</b>                   | 37                                                                | 1103             | 1140  |
| <b>Frequency Missing = 119</b> |                                                                   |                  |       |

Statistics for Table of cd4\_diagnosis\_transformed by HIV\_monoinfected\_vs\_HIV\_HBV

| Statistic                          | DF | Value  | Prob   |
|------------------------------------|----|--------|--------|
| <b>Chi-Square</b>                  | 2  | 2.1395 | 0.3371 |
| <b>Likelihood Ratio Chi-Square</b> | 2  | 2.2042 | 0.3322 |
| <b>Mantel-Haenszel Chi-Square</b>  | 1  | 0.9987 | 0.3176 |
| <b>Phi Coefficient</b>             |    | 0.0433 |        |
| <b>Contingency Coefficient</b>     |    | 0.0433 |        |
| <b>Cramer's V</b>                  |    | 0.0433 |        |

Effective Sample Size = 1140

Frequency Missing = 119

| Frequency<br>Col Pct           | Table of cd4_diagnosis_transformed by HIV_monoinfected_vs_HIV_HCV |                  |       |
|--------------------------------|-------------------------------------------------------------------|------------------|-------|
|                                | HIV_HCV                                                           | HIV_monoinfected | Total |
| <b>200-500</b>                 | 20<br>55.55                                                       | 473<br>42.88     | 493   |
| <b>&lt;200</b>                 | 6<br>16.67                                                        | 232<br>21.03     | 238   |
| <b>&gt;500</b>                 | 10<br>27.78                                                       | 398<br>36.08     | 408   |
| <b>Total</b>                   | 36                                                                | 1103             | 1139  |
| <b>Frequency Missing = 120</b> |                                                                   |                  |       |

Statistics for Table of cd4\_diagnosis\_transformed by HIV\_monoinfected\_vs\_HIV\_HCV

| Statistic                          | DF | Value  | Prob   |
|------------------------------------|----|--------|--------|
| <b>Chi-Square</b>                  | 2  | 2.2830 | 0.3143 |
| <b>Likelihood Ratio Chi-Square</b> | 2  | 2.2572 | 0.3235 |
| <b>Mantel-Haenszel Chi-Square</b>  | 1  | 1.9515 | 0.1624 |
| <b>Phi Coefficient</b>             |    | 0.0448 |        |
| <b>Contingency Coefficient</b>     |    | 0.0447 |        |
| <b>Cramer's V</b>                  |    | 0.0448 |        |

Effective Sample Size = 1139

Frequency Missing = 120

| Frequency<br>Col Pct          | Table of cd4_diagnosis_transformed by HIV_monoinfected_vs_Hepatitis |           |       |
|-------------------------------|---------------------------------------------------------------------|-----------|-------|
|                               | HIV_monoinfected                                                    | Hepatitis | Total |
| <b>200-500</b>                | 473                                                                 | 42        | 515   |
|                               | 42.88                                                               | 56.00     |       |
| <b>&lt;200</b>                | 232                                                                 | 11        | 243   |
|                               | 21.03                                                               | 14.67     |       |
| <b>&gt;500</b>                | 398                                                                 | 22        | 420   |
|                               | 36.08                                                               | 29.33     |       |
| <b>Total</b>                  | 1103                                                                | 75        | 1178  |
| <b>Frequency Missing = 81</b> |                                                                     |           |       |

Statistics for Table of cd4\_diagnosis\_transformed by HIV\_monoinfected\_vs\_Hepatitis

| Statistic                          | DF | Value  | Prob   |
|------------------------------------|----|--------|--------|
| <b>Chi-Square</b>                  | 2  | 5.0412 | 0.0774 |
| <b>Likelihood Ratio Chi-Square</b> | 2  | 5.0293 | 0.0809 |
| <b>Mantel-Haenszel Chi-Square</b>  | 1  | 3.5180 | 0.0607 |
| <b>Phi Coefficient</b>             |    | 0.0654 |        |
| <b>Contingency Coefficient</b>     |    | 0.0653 |        |
| <b>Cramer's V</b>                  |    | 0.0654 |        |

Effective Sample Size = 1178

Frequency Missing = 81

| Frequency<br>Col Pct | Table of cd4_diagnosis_transformed by HIV_HBV_vs_HIV_HCV |             |       |
|----------------------|----------------------------------------------------------|-------------|-------|
|                      | HIV_HBV                                                  | HIV_HCV     | Total |
| <b>200-500</b>       | 5<br>13.51                                               | 6<br>16.67  | 11    |
| <b>&lt;200</b>       | 20<br>54.05                                              | 20<br>55.56 | 40    |
| <b>&gt;500</b>       | 12<br>32.43                                              | 10<br>27.78 | 22    |
| <b>Total</b>         | 37                                                       | 36          | 73    |

Statistics for Table of cd4\_diagnosis\_transformed by HIV\_HBV\_vs\_HIV\_HCV

| Statistic                          | DF | Value  | Prob   |
|------------------------------------|----|--------|--------|
| <b>Chi-Square</b>                  | 2  | 2.2591 | 0.8790 |
| <b>Likelihood Ratio Chi-Square</b> | 2  | 2.0293 | 0.8809 |
| <b>Mantel-Haenszel Chi-Square</b>  | 1  | 2.5180 | 0.8607 |
| <b>Phi Coefficient</b>             |    | 0.0234 |        |
| <b>Contingency Coefficient</b>     |    | 0.0356 |        |
| <b>Cramer's V</b>                  |    | 0.0346 |        |

The UNIVARIATE Procedure  
 Variable: cd4\_diagnosis (cd4\_diagnosis)  
 HIV\_monoinfected

| <b>Moments</b>       |            |                    |            |
|----------------------|------------|--------------------|------------|
| <b>N</b>             | 1103       | <b>Sum Weights</b> | 1103       |
| <b>Mean</b>          | 449.499547 |                    |            |
| <b>Std Deviation</b> | 302.509462 | <b>Variance</b>    | 91511.9744 |
| <b>Skewness</b>      | 1.24370692 | <b>Kurtosis</b>    | 2.96352292 |

| <b>Quantiles (Definition 5)</b> |                 |
|---------------------------------|-----------------|
| <b>Quantile</b>                 | <b>Estimate</b> |
| <b>100% Max</b>                 | 2283            |
| <b>99%</b>                      | 1408            |
| <b>95%</b>                      | 974             |
| <b>90%</b>                      | 828             |
| <b>75% Q3</b>                   | 608             |
| <b>50% Median</b>               | 405             |
| <b>25% Q1</b>                   | 234             |
| <b>10%</b>                      | 99              |
| <b>5%</b>                       | 54              |
| <b>1%</b>                       | 14              |
| <b>0% Min</b>                   | 2               |

The SAS System

The UNIVARIATE Procedure

Variable: cd4\_diagnosis (cd4\_diagnosis) HIV\_HBV

| <b>Moments</b>       |            |                    |            |
|----------------------|------------|--------------------|------------|
| <b>N</b>             | 37         | <b>Sum Weights</b> | 37         |
| <b>Mean</b>          | 431.756757 |                    |            |
| <b>Std Deviation</b> | 224.619234 | <b>Variance</b>    | 50453.8003 |
| <b>Skewness</b>      | 0.90223774 | <b>Kurtosis</b>    | 1.86296389 |

| <b>Quantiles (Definition 5)</b> |                 |
|---------------------------------|-----------------|
| <b>Quantile</b>                 | <b>Estimate</b> |
| <b>100% Max</b>                 | 1138            |
| <b>99%</b>                      | 1138            |
| <b>95%</b>                      | 938             |
| <b>90%</b>                      | 701             |
| <b>75% Q3</b>                   | 557             |
| <b>50% Median</b>               | 387             |
| <b>25% Q1</b>                   | 287             |
| <b>10%</b>                      | 161             |
| <b>5%</b>                       | 74              |
| <b>1%</b>                       | 17              |

The NPAR1WAY Procedure

| <b>Wilcoxon Scores (Rank Sums) for Variable cd4_diagnosis<br/>Classified by Variable HIV_monoinfected_vs_HIV_HBV</b> |          |                      |
|----------------------------------------------------------------------------------------------------------------------|----------|----------------------|
| <b>HIV_monoinfected_vs_HIV_HBV</b>                                                                                   | <b>N</b> | <b>Sum of Scores</b> |
| <b>HIV_monoinfected</b>                                                                                              | 1103     | 629075.0             |
| <b>HIV_HBV</b>                                                                                                       | 37       | 21295.0              |

**Average scores were used for ties.**

| <b>Wilcoxon Two-Sample Test</b> |            |
|---------------------------------|------------|
| <b>Statistic</b>                | 21295.0000 |
| <b>Normal Approximation</b>     |            |
| <b>Z</b>                        | 0.0944     |
| <b>One-Sided Pr &gt; Z</b>      | 0.4624     |

**Wilcoxon Two-Sample Test**

**Two-Sided Pr > |Z|** 0.9248

The UNIVARIATE Procedure

Variable: cd4\_diagnosis (cd4\_diagnosis) HIV\_HCV

| <b>Moments</b>       |          |                    |          |
|----------------------|----------|--------------------|----------|
| <b>N</b>             | 36       | <b>Sum Weights</b> | 36       |
| <b>Mean</b>          | 402.5556 |                    |          |
| <b>Std Deviation</b> | 231.0224 | <b>Variance</b>    | 53371.34 |
| <b>Skewness</b>      | 1.289724 | <b>Kurtosis</b>    | 5.348068 |

**Quantiles (Definition 5)**

| <b>Quantile</b>   | <b>Estimate</b> |
|-------------------|-----------------|
| <b>100% Max</b>   | 1211            |
| <b>99%</b>        | 1211            |
| <b>95%</b>        | 815             |
| <b>90%</b>        | 697             |
| <b>75% Q3</b>     | 514             |
| <b>50% Median</b> | 377.5           |
| <b>25% Q1</b>     | 228.5           |
| <b>10%</b>        | 147             |
| <b>5%</b>         | 134             |
| <b>1%</b>         | 98              |

The SAS System

The NPAR1WAY Procedure

**Wilcoxon Scores (Rank Sums) for Variable cd4\_diagnosis  
Classified by Variable HIV\_monoinfected\_vs\_HIV\_HCV**

| <b>HIV_monoinfected_vs_HIV_HCV</b> | <b>N</b> | <b>Sum of Scores</b> |
|------------------------------------|----------|----------------------|
| <b>HIV_monoinfected</b>            | 1103     | 630146               |
| <b>HIV_HCV</b>                     | 36       | 19084                |

**Average scores were used for ties.**

**Wilcoxon Two-Sample Test**

**Statistic** 18418.000

**Normal Approximation**

| <b>Wilcoxon Two-Sample Test</b> |        |
|---------------------------------|--------|
| <b>Z</b>                        | 0.7394 |
| <b>One-Sided Pr &gt; Z</b>      | 0.2298 |
| <b>Two-Sided Pr &gt;  Z </b>    | 0.4597 |

The UNIVARIATE Procedure

Variable: cd4\_diagnosis (cd4\_diagnosis) HIV\_hepatitis

| <b>Moments</b>       |          |                    |          |
|----------------------|----------|--------------------|----------|
| <b>N</b>             | 75       | <b>Sum Weights</b> | 75       |
| <b>Mean</b>          | 417.3733 |                    |          |
| <b>Std Deviation</b> | 223.6863 | <b>Variance</b>    | 50035.56 |
| <b>Skewness</b>      | 1.084653 | <b>Kurtosis</b>    | 4.970194 |

| <b>Quantiles (Definition 5)</b> |                 |
|---------------------------------|-----------------|
| <b>Quantile</b>                 | <b>Estimate</b> |
| <b>100% Max</b>                 | 1211            |
| <b>99%</b>                      | 1211            |
| <b>95%</b>                      | 815             |
| <b>90%</b>                      | 697             |
| <b>75% Q3</b>                   | 522             |
| <b>50% Median</b>               | 387             |
| <b>25% Q1</b>                   | 257             |
| <b>10%</b>                      | 156             |
| <b>5%</b>                       | 134             |
| <b>1%</b>                       | 17              |

The NPAR1WAY Procedure

| <b>Wilcoxon Scores (Rank Sums) for Variable cd4_diagnosis<br/>Classified by Variable HIV_monoinfected_vs_HIV_hepatitis</b> |          |                      |
|----------------------------------------------------------------------------------------------------------------------------|----------|----------------------|
| <b>HIV_monoinfected_vs_HIV_HCV</b>                                                                                         | <b>N</b> | <b>Sum of Scores</b> |
| <b>HIV_monoinfected</b>                                                                                                    | 1103     | 651430.5             |
| <b>HIV_hepatitis</b>                                                                                                       | 75       | 43000.5              |
| <b>Average scores were used for ties.</b>                                                                                  |          |                      |

| <b>Wilcoxon Two-Sample Test</b> |          |
|---------------------------------|----------|
| <b>Statistic</b>                | 40150.50 |



| <b>Wilcoxon Two-Sample Test</b> |        |
|---------------------------------|--------|
| <b>Normal Approximation</b>     |        |
| <b>Z</b>                        | 0.4251 |
| <b>One-Sided Pr &gt; Z</b>      | 0.3354 |
| <b>Two-Sided Pr &gt;  Z </b>    | 0.6707 |

The NPAR1WAY Procedure

| <b>Wilcoxon Scores (Rank Sums) for Variable cd4_diagnosis<br/>Classified by Variable HIV_HBV_vs_HIV_HCV</b> |          |                          |
|-------------------------------------------------------------------------------------------------------------|----------|--------------------------|
| <b>HIV_HBV_vs_HIV_HCV</b>                                                                                   | <b>N</b> | <b>Sum of<br/>Scores</b> |
| <b>HIV_HBV</b>                                                                                              | 37       | 1452.5                   |
| <b>HIV_HCV</b>                                                                                              | 36       | 1248.5                   |
| <b>Average scores were used for ties.</b>                                                                   |          |                          |

| <b>Wilcoxon Two-Sample Test</b> |        |
|---------------------------------|--------|
| <b>Statistic</b>                | 582.50 |
| <b>Normal Approximation</b>     |        |
| <b>Z</b>                        | 0.9213 |
| <b>One-Sided Pr &gt; Z</b>      | 0.1784 |
| <b>Two-Sided Pr &gt;  Z </b>    | 0.3569 |

The UNIVARIATE Procedure  
 Variable: HIV\_viral\_load\_LOG (HIV\_viral\_load\_LOG)  
 HIV\_monoinfected\_

| <b>Moments</b>       |            |                    |            |
|----------------------|------------|--------------------|------------|
| <b>N</b>             | 1098       | <b>Sum Weights</b> | 1098       |
| <b>Mean</b>          | 4.02112754 |                    |            |
| <b>Std Deviation</b> | 0.61235927 | <b>Variance</b>    | 0.37498388 |
| <b>Skewness</b>      | -0.7940259 | <b>Kurtosis</b>    | 0.56704082 |

| <b>Quantiles (Definition 5)</b> |                 |
|---------------------------------|-----------------|
| <b>Quantile</b>                 | <b>Estimate</b> |
| <b>100% Max</b>                 | 4.99397         |
| <b>99%</b>                      | 4.96757         |
| <b>95%</b>                      | 4.87880         |
| <b>90%</b>                      | 4.75727         |
| <b>75% Q3</b>                   | 4.44988         |
| <b>50% Median</b>               | 4.09915         |
| <b>25% Q1</b>                   | 3.64205         |
| <b>10%</b>                      | 3.11926         |
| <b>5%</b>                       | 2.85673         |
| <b>1%</b>                       | 2.26007         |
| <b>0% Min</b>                   | 1.66745         |

The UNIVARIATE Procedure

Variable: HIV\_viral\_load\_LOG (HIV\_viral\_load\_LOG)

HIV\_monoinfected\_vs\_HIV\_HBV=HIV\_HBV

| <b>Moments</b>       |            |                    |            |
|----------------------|------------|--------------------|------------|
| <b>N</b>             | 34         | <b>Sum Weights</b> | 34         |
| <b>Mean</b>          | 3.80586445 |                    |            |
| <b>Std Deviation</b> | 1.09463913 | <b>Variance</b>    | 1.19823482 |
| <b>Skewness</b>      | -0.69925   | <b>Kurtosis</b>    | -0.4538951 |

| <b>Quantiles (Definition 5)</b> |                 |
|---------------------------------|-----------------|
| <b>Quantile</b>                 | <b>Estimate</b> |
| <b>100% Max</b>                 | 5.32314         |
| <b>99%</b>                      | 5.32314         |
| <b>95%</b>                      | 5.18959         |
| <b>90%</b>                      | 5.08189         |
| <b>75% Q3</b>                   | 4.49868         |
| <b>50% Median</b>               | 4.11798         |
| <b>25% Q1</b>                   | 3.17026         |
| <b>10%</b>                      | 1.86332         |
| <b>5%</b>                       | 1.60206         |
| <b>1%</b>                       | 1.60206         |
| <b>0% Min</b>                   | 1.60206         |

| <b>Wilcoxon Scores (Rank Sums) for Variable HIV_viral_load_LOG</b> |          |                      |
|--------------------------------------------------------------------|----------|----------------------|
| <b>Classified by Variable HIV_monoinfected_vs_HIV_HBV</b>          |          |                      |
| <b>HIV_monoinfected_vs_HIV_HBV</b>                                 | <b>N</b> | <b>Sum of Scores</b> |
| <b>HIV_monoinfected</b>                                            | 1098     | 622804.0             |
| <b>HIV_HBV</b>                                                     | 34       | 18474.0              |

| <b>Wilcoxon Two-Sample Test</b> |            |
|---------------------------------|------------|
| <b>Statistic</b>                | 18474.0000 |
| <b>Z</b>                        | -0.4189    |
| <b>One-Sided Pr &lt; Z</b>      | 0.3376     |
| <b>Two-Sided Pr &gt;  Z </b>    | 0.6753     |

The SAS System

The UNIVARIATE Procedure

Variable: HIV\_viral\_load\_LOG\_HIV\_HCV

| <b>Moments</b>       |           |                    |          |
|----------------------|-----------|--------------------|----------|
| <b>N</b>             | 27        | <b>Sum Weights</b> | 27       |
| <b>Mean</b>          | 4.236667  |                    |          |
| <b>Std Deviation</b> | .9510237  | <b>Variance</b>    | .904446  |
| <b>Skewness</b>      | -.5194416 | <b>Kurtosis</b>    | 3.514769 |

| <b>Quantiles (Definition 5)</b> |                 |
|---------------------------------|-----------------|
| <b>Quantile</b>                 | <b>Estimate</b> |
| <b>100% Max</b>                 | 5.95            |
| <b>99%</b>                      | 5.95            |
| <b>95%</b>                      | 5.68            |
| <b>90%</b>                      | 5.68            |
| <b>75% Q3</b>                   | 4.81            |
| <b>50% Median</b>               | 4.24            |
| <b>25% Q1</b>                   | 3.77            |
| <b>10%</b>                      | 2.83            |
| <b>5%</b>                       | 2.65            |
| <b>1%</b>                       | 1.7             |

| <b>Wilcoxon Scores (Rank Sums) for Variable HIV_viral_load_LOG<br/>Classified by Variable HIV_monoinfected_vs_HIV_HCV</b> |          |                          |
|---------------------------------------------------------------------------------------------------------------------------|----------|--------------------------|
| <b>HIV_monoinfected_vs_HIV_HCV</b>                                                                                        | <b>N</b> | <b>Sum of<br/>Scores</b> |
| <b>HIV_monoinfected</b>                                                                                                   | 1098     | 615581.5                 |
| <b>HIV_HCV</b>                                                                                                            | 27       | 17793.5                  |

| <b>Wilcoxon Two-Sample Test</b> |          |
|---------------------------------|----------|
| <b>Statistic</b>                | 12230.50 |
| <b>Normal Approximation</b>     |          |
| <b>Z</b>                        | 1.5544   |
| <b>One-Sided Pr &lt; Z</b>      | 0.0600   |
| <b>Two-Sided Pr &gt;  Z </b>    | 0.1201   |

The SAS System

The UNIVARIATE Procedure

Variable: HIV\_viral\_load\_LOG HIV\_hepatitis

| <b>Moments</b>       |           |                    |          |
|----------------------|-----------|--------------------|----------|
| <b>N</b>             | 63        | <b>Sum Weights</b> | 63       |
| <b>Mean</b>          | 3.984444  |                    |          |
| <b>Std Deviation</b> | 1.042074  | <b>Variance</b>    | 1.085919 |
| <b>Skewness</b>      | 0.6399357 | <b>Kurtosis</b>    | 2.940407 |

| <b>Quantiles (Definition 5)</b> |                 |
|---------------------------------|-----------------|
| <b>Quantile</b>                 | <b>Estimate</b> |
| <b>100% Max</b>                 | 5.95            |
| <b>99%</b>                      | 5.95            |
| <b>95%</b>                      | 5.32            |
| <b>90%</b>                      | 5.14            |
| <b>75% Q3</b>                   | 4.70            |
| <b>50% Median</b>               | 4.12            |
| <b>25% Q1</b>                   | 3.47            |
| <b>10%</b>                      | 2.65            |
| <b>5%</b>                       | 1.72            |
| <b>1%</b>                       | 1.6             |

**Wilcoxon Scores (Rank Sums) for Variable HIV\_viral\_load\_LOG  
Classified by Variable HIV\_monoinfected\_vs\_HIV\_hepatitis**

| <b>HIV_monoinfected_vs_HIV_hepatitis</b> | <b>N</b> | <b>Sum of Scores</b> |
|------------------------------------------|----------|----------------------|
| <b>HIV_monoinfected</b>                  | 1098     | 636424               |
| <b>HIV_hepatitis</b>                     | 63       | 38117                |

**Wilcoxon Two-Sample Test**

|                              |        |
|------------------------------|--------|
| <b>Statistic</b>             | 33073  |
| <b>Normal Approximation</b>  |        |
| <b>Z</b>                     | 0.5850 |
| <b>One-Sided Pr &lt; Z</b>   | 0.2793 |
| <b>Two-Sided Pr &gt;  Z </b> | 0.5586 |

**Wilcoxon Scores (Rank Sums) for Variable HIV\_viral\_load\_LOG  
Classified by Variable HIV\_HBV\_vs\_HIV\_HCV**

| <b>HIV_HBV_vs_HIV_HCV</b> | <b>N</b> | <b>Sum of Scores</b> |
|---------------------------|----------|----------------------|
| <b>HIV_HBV</b>            | 30       | 777.0                |
| <b>HIV_HCV</b>            | 27       | 876.0                |

**Wilcoxon Two-Sample Test**

|                              |        |
|------------------------------|--------|
| <b>Statistic</b>             | 312.00 |
| <b>Normal Approximation</b>  |        |
| <b>Z</b>                     | 14863  |
| <b>One-Sided Pr &lt; Z</b>   | 0.0686 |
| <b>Two-Sided Pr &gt;  Z </b> | 0.1372 |

**Table 4.** Effect of cART on CD4+ T-cell count, CD4/CD8 ratio and HIV viral load in HIV-coinfected patients

The SAS System

The UNIVARIATE Procedure  
 Variable: HBV (HBV)  
 cd\_4\_naïve

| <b>Moments</b>         |            |                         |            |
|------------------------|------------|-------------------------|------------|
| <b>N</b>               | 24         | <b>Sum Weights</b>      | 24         |
| <b>Mean</b>            | 347.541667 | <b>Sum Observations</b> | 8341       |
| <b>Std Deviation</b>   | 198.75569  | <b>Variance</b>         | 39503.8243 |
| <b>Skewness</b>        | 0.83695443 | <b>Kurtosis</b>         | 0.84732151 |
| <b>Uncorrected SS</b>  | 3807433    | <b>Corrected SS</b>     | 908587.958 |
| <b>Coeff Variation</b> | 57.1890248 | <b>Std Error Mean</b>   | 40.5708353 |

| <b>Quantiles (Definition 5)</b> |                 |
|---------------------------------|-----------------|
| <b>Quantile</b>                 | <b>Estimate</b> |
| <b>100% Max</b>                 | 869.0           |
| <b>99%</b>                      | 869.0           |
| <b>95%</b>                      | 701.0           |
| <b>90%</b>                      | 595.0           |
| <b>75% Q3</b>                   | 465.5           |
| <b>50% Median</b>               | 316.0           |
| <b>25% Q1</b>                   | 226.5           |
| <b>10%</b>                      | 128.0           |
| <b>5%</b>                       | 74.0            |
| <b>1%</b>                       | 30.0            |
| <b>0% Min</b>                   | 30.0            |

The UNIVARIATE Procedure

Variable: HBV (HBV)

Treat=cd\_4\_time\_12\_months

| <b>Moments</b>         |            |                         |            |
|------------------------|------------|-------------------------|------------|
| <b>N</b>               | 24         | <b>Sum Weights</b>      | 24         |
| <b>Mean</b>            | 514.625    | <b>Sum Observations</b> | 12351      |
| <b>Std Deviation</b>   | 230.574861 | <b>Variance</b>         | 53164.7663 |
| <b>Skewness</b>        | 1.16483499 | <b>Kurtosis</b>         | 1.96882452 |
| <b>Uncorrected SS</b>  | 7578923    | <b>Corrected SS</b>     | 1222789.63 |
| <b>Coeff Variation</b> | 44.8044422 | <b>Std Error Mean</b>   | 47.0658963 |

| <b>Quantiles (Definition 5)</b> |                 |
|---------------------------------|-----------------|
| <b>Quantile</b>                 | <b>Estimate</b> |
| <b>100% Max</b>                 | 1103.0          |
| <b>99%</b>                      | 1103.0          |
| <b>95%</b>                      | 1101.0          |
| <b>90%</b>                      | 678.0           |
| <b>75% Q3</b>                   | 612.5           |
| <b>50% Median</b>               | 512.0           |
| <b>25% Q1</b>                   | 346.0           |
| <b>10%</b>                      | 246.0           |
| <b>5%</b>                       | 243.0           |
| <b>1%</b>                       | 194.0           |
| <b>0% Min</b>                   | 194.0           |



The SAS System  
The NPAR1WAY Procedure  
Treat=cd\_4 count

| <b>Wilcoxon Scores (Rank Sums) for Variable HBV</b> |          |                      |                          |                         |                   |
|-----------------------------------------------------|----------|----------------------|--------------------------|-------------------------|-------------------|
| <b>Classified by Variable time_0_vs_12</b>          |          |                      |                          |                         |                   |
| <b>time_0_vs_12</b>                                 | <b>N</b> | <b>Sum of Scores</b> | <b>Expected Under H0</b> | <b>Std Dev Under H0</b> | <b>Mean Score</b> |
| <b>0</b>                                            | 24       | 462.0                | 588.0                    | 48.497423               | 19.250            |
| <b>12</b>                                           | 24       | 714.0                | 588.0                    | 48.497423               | 29.750            |

| <b>Wilcoxon Two-Sample Test</b>                   |          |
|---------------------------------------------------|----------|
| <b>Statistic</b>                                  | 462.0000 |
| <b>Normal Approximation</b>                       |          |
| <b>Z</b>                                          | -2.5878  |
| <b>One-Sided Pr &lt; Z</b>                        | 0.0048   |
| <b>Two-Sided Pr &gt;  Z </b>                      | 0.0097   |
| <b>t Approximation</b>                            |          |
| <b>One-Sided Pr &lt; Z</b>                        | 0.0064   |
| <b>Two-Sided Pr &gt;  Z </b>                      | 0.0128   |
| <b>Z includes a continuity correction of 0.5.</b> |          |

| <b>Kruskal-Wallis Test</b> |        |
|----------------------------|--------|
| <b>Chi-Square</b>          | 6.7500 |
| <b>DF</b>                  | 1      |
| <b>Pr &gt; Chi-Square</b>  | 0.0094 |

The UNIVARIATE Procedure

Variable: HBV (HBV)

Treat=cd\_4\_time\_24\_months

| <b>Moments</b>         |            |                         |            |
|------------------------|------------|-------------------------|------------|
| <b>N</b>               | 24         | <b>Sum Weights</b>      | 24         |
| <b>Mean</b>            | 597.5      | <b>Sum Observations</b> | 14340      |
| <b>Std Deviation</b>   | 229.043759 | <b>Variance</b>         | 52461.0435 |
| <b>Skewness</b>        | 0.13367518 | <b>Kurtosis</b>         | -0.0836305 |
| <b>Uncorrected SS</b>  | 9774754    | <b>Corrected SS</b>     | 1206604    |
| <b>Coeff Variation</b> | 38.3336835 | <b>Std Error Mean</b>   | 46.7533615 |

| <b>Quantiles (Definition 5)</b> |                 |
|---------------------------------|-----------------|
| <b>Quantile</b>                 | <b>Estimate</b> |
| <b>100% Max</b>                 | 1127.0          |
| <b>99%</b>                      | 1127.0          |
| <b>95%</b>                      | 908.0           |
| <b>90%</b>                      | 835.0           |
| <b>75% Q3</b>                   | 747.5           |
| <b>50% Median</b>               | 613.0           |
| <b>25% Q1</b>                   | 423.0           |
| <b>10%</b>                      | 312.0           |
| <b>5%</b>                       | 280.0           |
| <b>1%</b>                       | 170.0           |
| <b>0% Min</b>                   | 170.0           |

The NPAR1WAY Procedure  
Treat=cd\_4 cell count

| <b>Wilcoxon Scores (Rank Sums) for Variable HBV<br/>Classified by Variable time_0_vs_24</b> |          |                          |                              |                             |                       |
|---------------------------------------------------------------------------------------------|----------|--------------------------|------------------------------|-----------------------------|-----------------------|
| <b>time_0_vs_24</b>                                                                         | <b>N</b> | <b>Sum of<br/>Scores</b> | <b>Expected<br/>Under H0</b> | <b>Std Dev<br/>Under H0</b> | <b>Mean<br/>Score</b> |
| <b>0</b>                                                                                    | 24       | 414.50                   | 588.0                        | 48.494790                   | 17.270833             |
| <b>24</b>                                                                                   | 24       | 761.50                   | 588.0                        | 48.494790                   | 31.729167             |

**Average scores were used for ties.**

| <b>Wilcoxon Two-Sample Test</b>                       |          |
|-------------------------------------------------------|----------|
| <b>Statistic</b>                                      | 414.5000 |
| <b>Normal Approximation</b>                           |          |
| <b>Z</b>                                              | -3.5674  |
| <b>One-Sided Pr &lt; Z</b>                            | 0.0002   |
| <b>Two-Sided Pr &gt;  Z </b>                          | 0.0004   |
| <b>t Approximation</b>                                |          |
| <b>One-Sided Pr &lt; Z</b>                            | 0.0004   |
| <b>Two-Sided Pr &gt;  Z </b>                          | 0.0008   |
| <b>Z includes a continuity correction<br/>of 0.5.</b> |          |

| <b>Kruskal-Wallis Test</b> |         |
|----------------------------|---------|
| <b>Chi-Square</b>          | 12.8000 |
| <b>DF</b>                  | 1       |
| <b>Pr &gt; Chi-Square</b>  | 0.0003  |

The NPAR1WAY Procedure  
Treat=cd\_4\_count

**Wilcoxon Scores (Rank Sums) for Variable HBV  
Classified by Variable time\_12\_vs\_24**

| <b>time_12_vs_24</b> | <b>N</b> | <b>Sum of Scores</b> | <b>Expected Under H0</b> | <b>Std Dev Under H0</b> | <b>Mean Score</b> |
|----------------------|----------|----------------------|--------------------------|-------------------------|-------------------|
| <b>12</b>            | 24       | 503.50               | 588.0                    | 48.494790               | 20.979167         |
| <b>24</b>            | 24       | 672.50               | 588.0                    | 48.494790               | 28.020833         |

**Average scores were used for ties.**

**Wilcoxon Two-Sample Test**

**Statistic** 503.5000

**Normal Approximation**

**Z** -1.7321

**One-Sided Pr < Z** 0.0416

**Two-Sided Pr > |Z|** 0.0832

**t Approximation**

**One-Sided Pr < Z** 0.0449

**Two-Sided Pr > |Z|** 0.0898

**Z includes a continuity correction  
of 0.5.**

**Kruskal-Wallis Test**

**Chi-Square** 3.0362

**DF** 1

**Pr > Chi-Square** 0.0814

The UNIVARIATE Procedure  
 Variable: HBV (HBV)  
 cd\_4:cd\_8\_naïve

| <b>Moments</b>         |            |                         |            |
|------------------------|------------|-------------------------|------------|
| <b>N</b>               | 24         | <b>Sum Weights</b>      | 24         |
| <b>Mean</b>            | 0.40958333 | <b>Sum Observations</b> | 9.83       |
| <b>Std Deviation</b>   | 0.35201876 | <b>Variance</b>         | 0.12391721 |
| <b>Skewness</b>        | 1.92805077 | <b>Kurtosis</b>         | 4.49438498 |
| <b>Uncorrected SS</b>  | 6.8763     | <b>Corrected SS</b>     | 2.85009583 |
| <b>Coeff Variation</b> | 85.9455782 | <b>Std Error Mean</b>   | 0.07185553 |

| <b>Quantiles (Definition 5)</b> |                 |
|---------------------------------|-----------------|
| <b>Quantile</b>                 | <b>Estimate</b> |
| <b>100% Max</b>                 | 1.590           |
| <b>99%</b>                      | 1.590           |
| <b>95%</b>                      | 0.960           |
| <b>90%</b>                      | 0.900           |
| <b>75% Q3</b>                   | 0.585           |
| <b>50% Median</b>               | 0.295           |
| <b>25% Q1</b>                   | 0.185           |
| <b>10%</b>                      | 0.120           |
| <b>5%</b>                       | 0.080           |
| <b>1%</b>                       | 0.040           |
| <b>0% Min</b>                   | 0.040           |

The UNIVARIATE Procedure  
 Variable: HBV (HBV)  
 Treat=cd\_4:cd\_8 time\_12

| <b>Moments</b>         |            |                         |            |
|------------------------|------------|-------------------------|------------|
| <b>N</b>               | 24         | <b>Sum Weights</b>      | 24         |
| <b>Mean</b>            | 0.58375    | <b>Sum Observations</b> | 14.01      |
| <b>Std Deviation</b>   | 0.40338581 | <b>Variance</b>         | 0.16272011 |
| <b>Skewness</b>        | 1.60015192 | <b>Kurtosis</b>         | 2.77777703 |
| <b>Uncorrected SS</b>  | 11.9209    | <b>Corrected SS</b>     | 3.7425625  |
| <b>Coeff Variation</b> | 69.1024936 | <b>Std Error Mean</b>   | 0.08234078 |

| <b>Quantiles (Definition 5)</b> |                 |
|---------------------------------|-----------------|
| <b>Quantile</b>                 | <b>Estimate</b> |
| <b>100% Max</b>                 | 1.81            |
| <b>99%</b>                      | 1.81            |
| <b>95%</b>                      | 1.39            |
| <b>90%</b>                      | 1.08            |
| <b>75% Q3</b>                   | 0.70            |
| <b>50% Median</b>               | 0.48            |
| <b>25% Q1</b>                   | 0.30            |
| <b>10%</b>                      | 0.20            |
| <b>5%</b>                       | 0.19            |
| <b>1%</b>                       | 0.11            |
| <b>0% Min</b>                   | 0.11            |

The NPAR1WAY Procedure  
Treat=cd\_4/cd\_8

| <b>Wilcoxon Scores (Rank Sums) for Variable HBV<br/>Classified by Variable time_0_vs_12</b> |          |                          |                              |                             |                       |
|---------------------------------------------------------------------------------------------|----------|--------------------------|------------------------------|-----------------------------|-----------------------|
| <b>time_0_vs_12</b>                                                                         | <b>N</b> | <b>Sum of<br/>Scores</b> | <b>Expected<br/>Under H0</b> | <b>Std Dev<br/>Under H0</b> | <b>Mean<br/>Score</b> |
| <b>0</b>                                                                                    | 24       | 491.50                   | 588.0                        | 48.486892                   | 20.479167             |
| <b>12</b>                                                                                   | 24       | 684.50                   | 588.0                        | 48.486892                   | 28.520833             |

**Average scores were used for ties.**

| <b>Wilcoxon Two-Sample Test</b>                       |          |
|-------------------------------------------------------|----------|
| <b>Statistic</b>                                      | 491.5000 |
| <b>Normal Approximation</b>                           |          |
| <b>Z</b>                                              | -1.9799  |
| <b>One-Sided Pr &lt; Z</b>                            | 0.0239   |
| <b>Two-Sided Pr &gt;  Z </b>                          | 0.0477   |
| <b>t Approximation</b>                                |          |
| <b>One-Sided Pr &lt; Z</b>                            | 0.0268   |
| <b>Two-Sided Pr &gt;  Z </b>                          | 0.0536   |
| <b>Z includes a continuity correction<br/>of 0.5.</b> |          |

| <b>Kruskal-Wallis Test</b> |        |
|----------------------------|--------|
| <b>Chi-Square</b>          | 3.9610 |
| <b>DF</b>                  | 1      |
| <b>Pr &gt; Chi-Square</b>  | 0.0466 |

The UNIVARIATE Procedure

Variable: HBV (HBV)

Treat=cd\_4:cd\_8 time\_24\_months

| <b>Moments</b>         |            |                         |            |
|------------------------|------------|-------------------------|------------|
| <b>N</b>               | 24         | <b>Sum Weights</b>      | 24         |
| <b>Mean</b>            | 0.71291667 | <b>Sum Observations</b> | 17.11      |
| <b>Std Deviation</b>   | 0.35799537 | <b>Variance</b>         | 0.12816069 |
| <b>Skewness</b>        | 1.03779198 | <b>Kurtosis</b>         | 1.85730225 |
| <b>Uncorrected SS</b>  | 15.1457    | <b>Corrected SS</b>     | 2.94769583 |
| <b>Coeff Variation</b> | 50.215599  | <b>Std Error Mean</b>   | 0.0730755  |

| <b>Quantiles (Definition 5)</b> |                 |
|---------------------------------|-----------------|
| <b>Quantile</b>                 | <b>Estimate</b> |
| <b>100% Max</b>                 | 1.740           |
| <b>99%</b>                      | 1.740           |
| <b>95%</b>                      | 1.390           |
| <b>90%</b>                      | 0.970           |
| <b>75% Q3</b>                   | 0.885           |
| <b>50% Median</b>               | 0.655           |
| <b>25% Q1</b>                   | 0.480           |
| <b>10%</b>                      | 0.330           |
| <b>5%</b>                       | 0.230           |
| <b>1%</b>                       | 0.170           |
| <b>0% Min</b>                   | 0.170           |



The NPAR1WAY Procedure  
Treat=cd\_4/cd\_8

**Wilcoxon Scores (Rank Sums) for Variable HBV  
Classified by Variable time\_0\_vs\_24**

| <b>time_0_24</b> | <b>N</b> | <b>Sum of Scores</b> | <b>Expected Under H0</b> | <b>Std Dev Under H0</b> | <b>Mean Score</b> |
|------------------|----------|----------------------|--------------------------|-------------------------|-------------------|
| <b>0</b>         | 24       | 430.0                | 588.0                    | 48.481626               | 17.916667         |
| <b>24</b>        | 24       | 746.0                | 588.0                    | 48.481626               | 31.083333         |

Average scores were used for ties.

**Wilcoxon Two-Sample Test**

**Statistic** 430.0000

**Normal Approximation**

**Z** -3.2487

**One-Sided Pr < Z** 0.0006

**Two-Sided Pr > |Z|** 0.0012

**t Approximation**

**One-Sided Pr < Z** 0.0011

**Two-Sided Pr > |Z|** 0.0021

**Z includes a continuity correction of 0.5.**

**Kruskal-Wallis Test**

**Chi-Square** 10.6209

**DF** 1

**Pr > Chi-Square** 0.0011

The NPAR1WAY Procedure  
Treat=cd\_4/cd\_8

**Wilcoxon Scores (Rank Sums) for Variable HBV  
Classified by Variable time\_12\_vs\_24**

| <b>time_12_vs_24</b> | <b>N</b> | <b>Sum of Scores</b> | <b>Expected Under H0</b> | <b>Std Dev Under H0</b> | <b>Mean Score</b> |
|----------------------|----------|----------------------|--------------------------|-------------------------|-------------------|
| 12                   | 24       | 508.0                | 588.0                    | 48.481626               | 21.166667         |
| 24                   | 24       | 668.0                | 588.0                    | 48.481626               | 27.833333         |

Average scores were used for ties.

**Wilcoxon Two-Sample Test**

**Statistic** 508.0000

**Normal Approximation**

**Z** -1.6398

**One-Sided Pr < Z** 0.0505

**Two-Sided Pr > |Z|** 0.1010

**t Approximation**

**One-Sided Pr < Z** 0.0539

**Two-Sided Pr > |Z|** 0.1077

**Z includes a continuity correction of 0.5.**

**Kruskal-Wallis Test**

**Chi-Square** 2.7229

**DF** 1

**Pr > Chi-Square** 0.0989

The UNIVARIATE Procedure

Variable: HBV (HBV)

cv\_log\_naïve

| <b>Moments</b>         |            |                         |            |
|------------------------|------------|-------------------------|------------|
| <b>N</b>               | 20         | <b>Sum Weights</b>      | 20         |
| <b>Mean</b>            | 3.90788235 | <b>Sum Observations</b> | 78.157647  |
| <b>Std Deviation</b>   | 1.38726974 | <b>Variance</b>         | 1.92451734 |
| <b>Skewness</b>        | -0.643462  | <b>Kurtosis</b>         | -1.0758625 |
| <b>Uncorrected SS</b>  | 341.996718 | <b>Corrected SS</b>     | 36.5658295 |
| <b>Coeff Variation</b> | 35.499271  | <b>Std Error Mean</b>   | 0.31020295 |

| <b>Quantiles (Definition 5)</b> |                 |
|---------------------------------|-----------------|
| <b>Quantile</b>                 | <b>Estimate</b> |
| <b>100% Max</b>                 | 5.49958         |
| <b>99%</b>                      | 5.49958         |
| <b>95%</b>                      | 5.46713         |
| <b>90%</b>                      | 5.37892         |
| <b>75% Q3</b>                   | 5.10267         |
| <b>50% Median</b>               | 4.25391         |
| <b>25% Q1</b>                   | 2.64960         |
| <b>10%</b>                      | 1.69897         |
| <b>5%</b>                       | 1.69897         |
| <b>1%</b>                       | 1.69897         |
| <b>0% Min</b>                   | 1.69897         |

The UNIVARIATE Procedure

Variable: HBV (HBV)

Treat=cv\_log time\_12\_months

| <b>Moments</b>         |            |                         |            |
|------------------------|------------|-------------------------|------------|
| <b>N</b>               | 24         | <b>Sum Weights</b>      | 24         |
| <b>Mean</b>            | 1.84097179 | <b>Sum Observations</b> | 44.183323  |
| <b>Std Deviation</b>   | 0.36142809 | <b>Variance</b>         | 0.13063026 |
| <b>Skewness</b>        | 1.39137635 | <b>Kurtosis</b>         | 2.04905513 |
| <b>Uncorrected SS</b>  | 84.3447474 | <b>Corrected SS</b>     | 3.00449606 |
| <b>Coeff Variation</b> | 19.6324621 | <b>Std Error Mean</b>   | 0.0737762  |

| <b>Quantiles (Definition 5)</b> |                 |
|---------------------------------|-----------------|
| <b>Quantile</b>                 | <b>Estimate</b> |
| <b>100% Max</b>                 | 2.80889         |
| <b>99%</b>                      | 2.80889         |
| <b>95%</b>                      | 2.60206         |
| <b>90%</b>                      | 2.55630         |
| <b>75% Q3</b>                   | 1.90224         |
| <b>50% Median</b>               | 1.69897         |
| <b>25% Q1</b>                   | 1.69897         |
| <b>10%</b>                      | 1.65321         |
| <b>5%</b>                       | 1.30103         |
| <b>1%</b>                       | 1.30103         |
| <b>0% Min</b>                   | 1.30103         |

The NPAR1WAY Procedure  
Treat=cv\_log

| <b>Wilcoxon Scores (Rank Sums) for Variable HBV<br/>Classified by Variable time_0_vs_12</b> |          |                          |                              |                             |                       |
|---------------------------------------------------------------------------------------------|----------|--------------------------|------------------------------|-----------------------------|-----------------------|
| <b>time_0_vs_12</b>                                                                         | <b>N</b> | <b>Sum of<br/>Scores</b> | <b>Expected<br/>Under H0</b> | <b>Std Dev<br/>Under H0</b> | <b>Mean<br/>Score</b> |
| <b>0</b>                                                                                    | 20       | 627.0                    | 450.0                        | 41.739148                   | 31.3500               |
| <b>12</b>                                                                                   | 24       | 363.0                    | 540.0                        | 41.739148                   | 15.1250               |

**Average scores were used for ties.**

| <b>Wilcoxon Two-Sample Test</b>                       |          |
|-------------------------------------------------------|----------|
| <b>Statistic</b>                                      | 627.0000 |
| <b>Normal Approximation</b>                           |          |
| <b>Z</b>                                              | 4.2286   |
| <b>One-Sided Pr &gt; Z</b>                            | <.0001   |
| <b>Two-Sided Pr &gt;  Z </b>                          | <.0001   |
| <b>t Approximation</b>                                |          |
| <b>One-Sided Pr &gt; Z</b>                            | <.0001   |
| <b>Two-Sided Pr &gt;  Z </b>                          | 0.0001   |
| <b>Z includes a continuity correction<br/>of 0.5.</b> |          |

| <b>Kruskal-Wallis Test</b> |         |
|----------------------------|---------|
| <b>Chi-Square</b>          | 17.9829 |
| <b>DF</b>                  | 1       |
| <b>Pr &gt; Chi-Square</b>  | <.0001  |

The UNIVARIATE Procedure

Variable: HBV (HBV)

Treat=cv\_log time\_24\_months

| <b>Moments</b>         |            |                         |            |
|------------------------|------------|-------------------------|------------|
| <b>N</b>               | 24         | <b>Sum Weights</b>      | 24         |
| <b>Mean</b>            | 1.64018853 | <b>Sum Observations</b> | 39.3645247 |
| <b>Std Deviation</b>   | 0.34071471 | <b>Variance</b>         | 0.11608651 |
| <b>Skewness</b>        | 2.68138938 | <b>Kurtosis</b>         | 10.8251556 |
| <b>Uncorrected SS</b>  | 67.2352315 | <b>Corrected SS</b>     | 2.6699898  |
| <b>Coeff Variation</b> | 20.7728992 | <b>Std Error Mean</b>   | 0.0695481  |

| <b>Quantiles (Definition 5)</b> |                 |
|---------------------------------|-----------------|
| <b>Quantile</b>                 | <b>Estimate</b> |
| <b>100% Max</b>                 | 2.99056         |
| <b>99%</b>                      | 2.99056         |
| <b>95%</b>                      | 1.83251         |
| <b>90%</b>                      | 1.75587         |
| <b>75% Q3</b>                   | 1.69897         |
| <b>50% Median</b>               | 1.69897         |
| <b>25% Q1</b>                   | 1.39794         |
| <b>10%</b>                      | 1.30103         |
| <b>5%</b>                       | 1.30103         |
| <b>1%</b>                       | 1.30103         |
| <b>0% Min</b>                   | 1.30103         |

The NPAR1WAY Procedure  
Treat=cv\_log

**Wilcoxon Scores (Rank Sums) for Variable HBV  
Classified by Variable time\_0\_vs\_24**

| <b>time_0_vs_24</b> | <b>N</b> | <b>Sum of Scores</b> | <b>Expected Under H0</b> | <b>Std Dev Under H0</b> | <b>Mean Score</b> |
|---------------------|----------|----------------------|--------------------------|-------------------------|-------------------|
| <b>0</b>            | 20       | 650.0                | 450.0                    | 41.151502               | 32.500000         |
| <b>24</b>           | 24       | 340.0                | 540.0                    | 41.151502               | 14.166667         |

Average scores were used for ties.

**Wilcoxon Two-Sample Test**

**Statistic** 650.0000

**Normal Approximation**

**Z** 4.8479

**One-Sided Pr > Z** <.0001

**Two-Sided Pr > |Z|** <.0001

**t Approximation**

**One-Sided Pr > Z** <.0001

**Two-Sided Pr > |Z|** <.0001

**Z includes a continuity correction  
of 0.5.**

**Kruskal-Wallis Test**

**Chi-Square** 23.6205

**DF** 1

**Pr > Chi-Square** <.0001

The NPAR1WAY Procedure  
Treat=cv\_log

**Wilcoxon Scores (Rank Sums) for Variable HBV  
Classified by Variable time\_12\_vs\_24**

| <b>time_12_vs_24</b> | <b>N</b> | <b>Sum of Scores</b> | <b>Expected Under H0</b> | <b>Std Dev Under H0</b> | <b>Mean Score</b> |
|----------------------|----------|----------------------|--------------------------|-------------------------|-------------------|
| 12                   | 24       | 692.0                | 588.0                    | 45.672283               | 28.833333         |
| 24                   | 24       | 484.0                | 588.0                    | 45.672283               | 20.166667         |

Average scores were used for ties.

**Wilcoxon Two-Sample Test**

**Statistic** 692.0000

**Normal Approximation**

**Z** 2.2661

**One-Sided Pr > Z** 0.0117

**Two-Sided Pr > |Z|** 0.0234

**t Approximation**

**One-Sided Pr > Z** 0.0140

**Two-Sided Pr > |Z|** 0.0281

**Z includes a continuity correction of 0.5.**

**Kruskal-Wallis Test**

**Chi-Square** 5.1851

**DF** 1

**Pr > Chi-Square** 0.0228



The UNIVARIATE Procedure

Variable: HCV (HCV)

cd\_4\_naive

| <b>Moments</b>         |            |                         |            |
|------------------------|------------|-------------------------|------------|
| <b>N</b>               | 23         | <b>Sum Weights</b>      | 23         |
| <b>Mean</b>            | 364.521739 | <b>Sum Observations</b> | 8384       |
| <b>Std Deviation</b>   | 269.03884  | <b>Variance</b>         | 72381.8972 |
| <b>Skewness</b>        | 1.82338367 | <b>Kurtosis</b>         | 3.35485997 |
| <b>Uncorrected SS</b>  | 4648552    | <b>Corrected SS</b>     | 1592401.74 |
| <b>Coeff Variation</b> | 73.8059794 | <b>Std Error Mean</b>   | 56.098476  |

| <b>Quantiles (Definition 5)</b> |                 |
|---------------------------------|-----------------|
| <b>Quantile</b>                 | <b>Estimate</b> |
| <b>100% Max</b>                 | 1171            |
| <b>99%</b>                      | 1171            |
| <b>95%</b>                      | 977             |
| <b>90%</b>                      | 697             |
| <b>75% Q3</b>                   | 478             |
| <b>50% Median</b>               | 304             |
| <b>25% Q1</b>                   | 154             |
| <b>10%</b>                      | 141             |
| <b>5%</b>                       | 140             |
| <b>1%</b>                       | 67              |
| <b>0% Min</b>                   | 67              |

The UNIVARIATE Procedure  
 Variable: HCV (HCV)  
 Treat=cd\_4 time\_12\_months

| <b>Moments</b>         |            |                         |            |
|------------------------|------------|-------------------------|------------|
| <b>N</b>               | 23         | <b>Sum Weights</b>      | 23         |
| <b>Mean</b>            | 407.934633 | <b>Sum Observations</b> | 9382.49657 |
| <b>Std Deviation</b>   | 208.678839 | <b>Variance</b>         | 43546.8577 |
| <b>Skewness</b>        | 1.43441038 | <b>Kurtosis</b>         | 1.88947398 |
| <b>Uncorrected SS</b>  | 4785476.17 | <b>Corrected SS</b>     | 958030.87  |
| <b>Coeff Variation</b> | 51.1549699 | <b>Std Error Mean</b>   | 43.5125458 |

| <b>Quantiles (Definition 5)</b> |                 |
|---------------------------------|-----------------|
| <b>Quantile</b>                 | <b>Estimate</b> |
| <b>100% Max</b>                 | 1009.33         |
| <b>99%</b>                      | 1009.33         |
| <b>95%</b>                      | 786.00          |
| <b>90%</b>                      | 706.00          |
| <b>75% Q3</b>                   | 555.50          |
| <b>50% Median</b>               | 344.00          |
| <b>25% Q1</b>                   | 252.00          |
| <b>10%</b>                      | 209.00          |
| <b>5%</b>                       | 208.00          |
| <b>1%</b>                       | 191.00          |
| <b>0% Min</b>                   | 191.00          |

The NPAR1WAY Procedure  
Treat=cd\_4

**Wilcoxon Scores (Rank Sums) for Variable HCV  
Classified by Variable time\_0\_vs\_12**

| <b>time_0_vs_12</b> | <b>N</b> | <b>Sum of Scores</b> | <b>Expected Under H0</b> | <b>Std Dev Under H0</b> | <b>Mean Score</b> |
|---------------------|----------|----------------------|--------------------------|-------------------------|-------------------|
| <b>0</b>            | 23       | 477.50               | 540.50                   | 45.516908               | 20.760870         |
| <b>12</b>           | 23       | 603.50               | 540.50                   | 45.516908               | 26.239130         |

**Average scores were used for ties.**

**Wilcoxon Two-Sample Test**

|                                                   |          |
|---------------------------------------------------|----------|
| <b>Statistic</b>                                  | 477.5000 |
| <b>Normal Approximation</b>                       |          |
| <b>Z</b>                                          | -1.3731  |
| <b>One-Sided Pr &lt; Z</b>                        | 0.0849   |
| <b>Two-Sided Pr &gt;  Z </b>                      | 0.1697   |
| <b>t Approximation</b>                            |          |
| <b>One-Sided Pr &lt; Z</b>                        | 0.0883   |
| <b>Two-Sided Pr &gt;  Z </b>                      | 0.1765   |
| <b>Z includes a continuity correction of 0.5.</b> |          |

**Kruskal-Wallis Test**

|                           |        |
|---------------------------|--------|
| <b>Chi-Square</b>         | 1.9157 |
| <b>DF</b>                 | 1      |
| <b>Pr &gt; Chi-Square</b> | 0.1663 |

The UNIVARIATE Procedure  
 Variable: HCV (HCV)  
 Treat=cd\_4 time\_24\_months

| <b>Moments</b>         |            |                         |            |
|------------------------|------------|-------------------------|------------|
| <b>N</b>               | 23         | <b>Sum Weights</b>      | 23         |
| <b>Mean</b>            | 521.094893 | <b>Sum Observations</b> | 11985.1825 |
| <b>Std Deviation</b>   | 179.657242 | <b>Variance</b>         | 32276.7245 |
| <b>Skewness</b>        | 1.35136353 | <b>Kurtosis</b>         | 2.22099672 |
| <b>Uncorrected SS</b>  | 6955505.35 | <b>Corrected SS</b>     | 710087.94  |
| <b>Coeff Variation</b> | 34.4768763 | <b>Std Error Mean</b>   | 37.4611245 |

| <b>Quantiles (Definition 5)</b> |                 |
|---------------------------------|-----------------|
| <b>Quantile</b>                 | <b>Estimate</b> |
| <b>100% Max</b>                 | 1029.50         |
| <b>99%</b>                      | 1029.50         |
| <b>95%</b>                      | 898.25          |
| <b>90%</b>                      | 755.00          |
| <b>75% Q3</b>                   | 561.00          |
| <b>50% Median</b>               | 485.00          |
| <b>25% Q1</b>                   | 406.00          |
| <b>10%</b>                      | 357.00          |
| <b>5%</b>                       | 312.60          |
| <b>1%</b>                       | 260.00          |
| <b>0% Min</b>                   | 260.00          |

The NPAR1WAY Procedure  
Treat=cd\_4

| <b>Wilcoxon Scores (Rank Sums) for Variable HCV<br/>Classified by Variable time_0_vs_24</b> |          |                          |                              |                             |                       |
|---------------------------------------------------------------------------------------------|----------|--------------------------|------------------------------|-----------------------------|-----------------------|
| <b>time_0_vs_24</b>                                                                         | <b>N</b> | <b>Sum of<br/>Scores</b> | <b>Expected<br/>Under H0</b> | <b>Std Dev<br/>Under H0</b> | <b>Mean<br/>Score</b> |
| <b>0</b>                                                                                    | 23       | 389.0                    | 540.50                       | 45.518311                   | 16.913043             |
| <b>24</b>                                                                                   | 23       | 692.0                    | 540.50                       | 45.518311                   | 30.086957             |

| <b>Wilcoxon Two-Sample Test</b>                       |          |
|-------------------------------------------------------|----------|
| <b>Statistic</b>                                      | 389.0000 |
| <b>Normal Approximation</b>                           |          |
| <b>Z</b>                                              | -3.3173  |
| <b>One-Sided Pr &lt; Z</b>                            | 0.0005   |
| <b>Two-Sided Pr &gt;  Z </b>                          | 0.0009   |
| <b>t Approximation</b>                                |          |
| <b>One-Sided Pr &lt; Z</b>                            | 0.0009   |
| <b>Two-Sided Pr &gt;  Z </b>                          | 0.0018   |
| <b>Z includes a continuity correction<br/>of 0.5.</b> |          |

| <b>Kruskal-Wallis Test</b> |         |
|----------------------------|---------|
| <b>Chi-Square</b>          | 11.0778 |
| <b>DF</b>                  | 1       |
| <b>Pr &gt; Chi-Square</b>  | 0.0009  |

The NPAR1WAY Procedure  
Treat=cd\_4

| <b>Wilcoxon Scores (Rank Sums) for Variable HCV<br/>Classified by Variable time_12_vs_24</b> |          |                          |                              |                             |                       |
|----------------------------------------------------------------------------------------------|----------|--------------------------|------------------------------|-----------------------------|-----------------------|
| <b>time_12_vs_24</b>                                                                         | <b>N</b> | <b>Sum of<br/>Scores</b> | <b>Expected<br/>Under H0</b> | <b>Std Dev<br/>Under H0</b> | <b>Mean<br/>Score</b> |
| <b>12</b>                                                                                    | 23       | 430.0                    | 540.50                       | 45.518311                   | 18.695652             |
| <b>24</b>                                                                                    | 23       | 651.0                    | 540.50                       | 45.518311                   | 28.304348             |

| <b>Wilcoxon Two-Sample Test</b>                       |          |
|-------------------------------------------------------|----------|
| <b>Statistic</b>                                      | 430.0000 |
| <b>Normal Approximation</b>                           |          |
| <b>Z</b>                                              | -2.4166  |
| <b>One-Sided Pr &lt; Z</b>                            | 0.0078   |
| <b>Two-Sided Pr &gt;  Z </b>                          | 0.0157   |
| <b>t Approximation</b>                                |          |
| <b>One-Sided Pr &lt; Z</b>                            | 0.0099   |
| <b>Two-Sided Pr &gt;  Z </b>                          | 0.0198   |
| <b>Z includes a continuity correction<br/>of 0.5.</b> |          |

| <b>Kruskal-Wallis Test</b> |        |
|----------------------------|--------|
| <b>Chi-Square</b>          | 5.8932 |
| <b>DF</b>                  | 1      |
| <b>Pr &gt; Chi-Square</b>  | 0.0152 |

The UNIVARIATE Procedure

Variable: HCV (HCV)

cd\_4:cd\_8\_naïve

| <b>Moments</b>         |            |                         |            |
|------------------------|------------|-------------------------|------------|
| <b>N</b>               | 21         | <b>Sum Weights</b>      | 21         |
| <b>Mean</b>            | 0.37952381 | <b>Sum Observations</b> | 7.97       |
| <b>Std Deviation</b>   | 0.30292699 | <b>Variance</b>         | 0.09176476 |
| <b>Skewness</b>        | 1.4991632  | <b>Kurtosis</b>         | 1.90482872 |
| <b>Uncorrected SS</b>  | 4.8601     | <b>Corrected SS</b>     | 1.83529524 |
| <b>Coeff Variation</b> | 79.8176513 | <b>Std Error Mean</b>   | 0.06610409 |

| <b>Quantiles (Definition 5)</b> |                 |
|---------------------------------|-----------------|
| <b>Quantile</b>                 | <b>Estimate</b> |
| <b>100% Max</b>                 | 1.20            |
| <b>99%</b>                      | 1.20            |
| <b>95%</b>                      | 0.93            |
| <b>90%</b>                      | 0.93            |
| <b>75% Q3</b>                   | 0.47            |
| <b>50% Median</b>               | 0.32            |
| <b>25% Q1</b>                   | 0.16            |
| <b>10%</b>                      | 0.13            |
| <b>5%</b>                       | 0.06            |
| <b>1%</b>                       | 0.04            |
| <b>0% Min</b>                   | 0.04            |

The UNIVARIATE Procedure

Variable: HCV (HCV)

Treat=cd\_4:cd\_8\_time\_12\_months

| <b>Moments</b>         |            |                         |            |
|------------------------|------------|-------------------------|------------|
| <b>N</b>               | 23         | <b>Sum Weights</b>      | 23         |
| <b>Mean</b>            | 0.46947705 | <b>Sum Observations</b> | 10.797972  |
| <b>Std Deviation</b>   | 0.25162292 | <b>Variance</b>         | 0.06331409 |
| <b>Skewness</b>        | 1.14999088 | <b>Kurtosis</b>         | 2.20756216 |
| <b>Uncorrected SS</b>  | 6.46231007 | <b>Corrected SS</b>     | 1.39291006 |
| <b>Coeff Variation</b> | 53.5964265 | <b>Std Error Mean</b>   | 0.05246701 |

| <b>Quantiles (Definition 5)</b> |                 |
|---------------------------------|-----------------|
| <b>Quantile</b>                 | <b>Estimate</b> |
| <b>100% Max</b>                 | 1.202538        |
| <b>99%</b>                      | 1.202538        |
| <b>95%</b>                      | 0.929559        |
| <b>90%</b>                      | 0.697546        |
| <b>75% Q3</b>                   | 0.561721        |
| <b>50% Median</b>               | 0.481043        |
| <b>25% Q1</b>                   | 0.288509        |
| <b>10%</b>                      | 0.181119        |
| <b>5%</b>                       | 0.167385        |
| <b>1%</b>                       | 0.105423        |
| <b>0% Min</b>                   | 0.105423        |



The NPAR1WAY Procedure  
Treat=cd\_4\_8

**Wilcoxon Scores (Rank Sums) for Variable HCV  
Classified by Variable time\_0\_vs\_12**

| <b>time_0_vs_12</b> | <b>N</b> | <b>Sum of Scores</b> | <b>Expected Under H0</b> | <b>Std Dev Under H0</b> | <b>Mean Score</b> |
|---------------------|----------|----------------------|--------------------------|-------------------------|-------------------|
| <b>0</b>            | 21       | 395.0                | 472.50                   | 42.555784               | 18.809524         |
| <b>12</b>           | 23       | 595.0                | 517.50                   | 42.555784               | 25.869565         |

Average scores were used for ties.

**Wilcoxon Two-Sample Test**

**Statistic** 395.0000

**Normal Approximation**

**Z** -1.8094

**One-Sided Pr < Z** 0.0352

**Two-Sided Pr > |Z|** 0.0704

**t Approximation**

**One-Sided Pr < Z** 0.0387

**Two-Sided Pr > |Z|** 0.0774

**Z includes a continuity correction  
of 0.5.**

**Kruskal-Wallis Test**

**Chi-Square** 3.3165

**DF** 1

**Pr > Chi-Square** 0.0686

The UNIVARIATE Procedure

Variable: HCV (HCV)

Treat=cd\_4:cd\_8\_time\_24\_months

| <b>Moments</b>         |            |                         |            |
|------------------------|------------|-------------------------|------------|
| <b>N</b>               | 23         | <b>Sum Weights</b>      | 23         |
| <b>Mean</b>            | 0.5903869  | <b>Sum Observations</b> | 13.5788988 |
| <b>Std Deviation</b>   | 0.24704325 | <b>Variance</b>         | 0.06103037 |
| <b>Skewness</b>        | 1.09898667 | <b>Kurtosis</b>         | 2.00357549 |
| <b>Uncorrected SS</b>  | 9.3594721  | <b>Corrected SS</b>     | 1.34266812 |
| <b>Coeff Variation</b> | 41.8442977 | <b>Std Error Mean</b>   | 0.05151208 |

| <b>Quantiles (Definition 5)</b> |                 |
|---------------------------------|-----------------|
| <b>Quantile</b>                 | <b>Estimate</b> |
| <b>100% Max</b>                 | 1.313138        |
| <b>99%</b>                      | 1.313138        |
| <b>95%</b>                      | 0.935780        |
| <b>90%</b>                      | 0.872832        |
| <b>75% Q3</b>                   | 0.708029        |
| <b>50% Median</b>               | 0.496272        |
| <b>25% Q1</b>                   | 0.433754        |
| <b>10%</b>                      | 0.332751        |
| <b>5%</b>                       | 0.317933        |
| <b>1%</b>                       | 0.185464        |
| <b>0% Min</b>                   | 0.185464        |

The NPAR1WAY Procedure  
Treat=cd\_4\_8

**Wilcoxon Scores (Rank Sums) for Variable HCV  
Classified by Variable time\_0\_vs\_24**

| <b>time_0_vs_24</b> | <b>N</b> | <b>Sum of<br/>Scores</b> | <b>Expected<br/>Under H0</b> | <b>Std Dev<br/>Under H0</b> | <b>Mean<br/>Score</b> |
|---------------------|----------|--------------------------|------------------------------|-----------------------------|-----------------------|
| <b>0</b>            | 21       | 348.0                    | 472.50                       | 42.555784                   | 16.571429             |
| <b>24</b>           | 23       | 642.0                    | 517.50                       | 42.555784                   | 27.913043             |

**Average scores were used for ties.**

**Wilcoxon Two-Sample Test**

|                                                       |          |
|-------------------------------------------------------|----------|
| <b>Statistic</b>                                      | 348.0000 |
| <b>Normal Approximation</b>                           |          |
| <b>Z</b>                                              | -2.9138  |
| <b>One-Sided Pr &lt; Z</b>                            | 0.0018   |
| <b>Two-Sided Pr &gt;  Z </b>                          | 0.0036   |
| <b>t Approximation</b>                                |          |
| <b>One-Sided Pr &lt; Z</b>                            | 0.0028   |
| <b>Two-Sided Pr &gt;  Z </b>                          | 0.0056   |
| <b>Z includes a continuity correction<br/>of 0.5.</b> |          |

**Kruskal-Wallis Test**

|                           |        |
|---------------------------|--------|
| <b>Chi-Square</b>         | 8.5590 |
| <b>DF</b>                 | 1      |
| <b>Pr &gt; Chi-Square</b> | 0.0034 |

The NPAR1WAY Procedure  
Treat=cd\_4\_8

**Wilcoxon Scores (Rank Sums) for Variable HCV  
Classified by Variable time\_12\_vs\_24**

| <b>time_12_vs_24</b> | <b>N</b> | <b>Sum of<br/>Scores</b> | <b>Expected<br/>Under H0</b> | <b>Std Dev<br/>Under H0</b> | <b>Mean<br/>Score</b> |
|----------------------|----------|--------------------------|------------------------------|-----------------------------|-----------------------|
| <b>12</b>            | 23       | 463.0                    | 540.50                       | 45.518311                   | 20.130435             |
| <b>24</b>            | 23       | 618.0                    | 540.50                       | 45.518311                   | 26.869565             |

**Wilcoxon Two-Sample Test**

**Statistic** 463.0000

**Normal Approximation**

**Z** -1.6916

**One-Sided Pr < Z** 0.0454

**Two-Sided Pr > |Z|** 0.0907

**t Approximation**

**One-Sided Pr < Z** 0.0488

**Two-Sided Pr > |Z|** 0.0976

**Z includes a continuity correction  
of 0.5.**

**Kruskal-Wallis Test**

**Chi-Square** 2.8989

**DF** 1

**Pr > Chi-Square** 0.0886

The UNIVARIATE Procedure  
 Variable: HCV (HCV)  
 cv\_log\_naïve

| <b>Moments</b>         |            |                         |            |
|------------------------|------------|-------------------------|------------|
| <b>N</b>               | 19         | <b>Sum Weights</b>      | 19         |
| <b>Mean</b>            | 3.84786664 | <b>Sum Observations</b> | 73.1094661 |
| <b>Std Deviation</b>   | 1.63562441 | <b>Variance</b>         | 2.6752672  |
| <b>Skewness</b>        | -0.1319716 | <b>Kurtosis</b>         | -1.4781717 |
| <b>Uncorrected SS</b>  | 329.470285 | <b>Corrected SS</b>     | 48.1548095 |
| <b>Coeff Variation</b> | 42.5073049 | <b>Std Error Mean</b>   | 0.37523797 |

| <b>Quantiles (Definition 5)</b> |                 |
|---------------------------------|-----------------|
| <b>Quantile</b>                 | <b>Estimate</b> |
| <b>100% Max</b>                 | 6.00000         |
| <b>99%</b>                      | 6.00000         |
| <b>95%</b>                      | 6.00000         |
| <b>90%</b>                      | 6.00000         |
| <b>75% Q3</b>                   | 5.35218         |
| <b>50% Median</b>               | 4.05258         |
| <b>25% Q1</b>                   | 1.69897         |
| <b>10%</b>                      | 1.69897         |
| <b>5%</b>                       | 1.69897         |
| <b>1%</b>                       | 1.69897         |
| <b>0% Min</b>                   | 1.69897         |

The SAS System

The UNIVARIATE Procedure  
Variable: HCV (HCV)  
Treat=cv\_log time\_12\_months

| <b>Moments</b>         |            |                         |            |
|------------------------|------------|-------------------------|------------|
| <b>N</b>               | 23         | <b>Sum Weights</b>      | 23         |
| <b>Mean</b>            | 1.8309835  | <b>Sum Observations</b> | 42.1126206 |
| <b>Std Deviation</b>   | 0.51657329 | <b>Variance</b>         | 0.26684797 |
| <b>Skewness</b>        | 2.457642   | <b>Kurtosis</b>         | 6.03110656 |
| <b>Uncorrected SS</b>  | 82.9781689 | <b>Corrected SS</b>     | 5.87065527 |
| <b>Coeff Variation</b> | 28.2128862 | <b>Std Error Mean</b>   | 0.10771298 |

| <b>Quantiles (Definition 5)</b> |                 |
|---------------------------------|-----------------|
| <b>Quantile</b>                 | <b>Estimate</b> |
| <b>100% Max</b>                 | 3.58422         |
| <b>99%</b>                      | 3.58422         |
| <b>95%</b>                      | 2.83948         |
| <b>90%</b>                      | 2.73640         |
| <b>75% Q3</b>                   | 1.69897         |
| <b>50% Median</b>               | 1.69897         |
| <b>25% Q1</b>                   | 1.69897         |
| <b>10%</b>                      | 1.39794         |
| <b>5%</b>                       | 1.39794         |
| <b>1%</b>                       | 1.30103         |
| <b>0% Min</b>                   | 1.30103         |

The NPAR1WAY Procedure  
Treat=cv\_log

| <b>Wilcoxon Scores (Rank Sums) for Variable HCV<br/>Classified by Variable time_0_vs_12</b> |          |                          |                              |                             |                       |
|---------------------------------------------------------------------------------------------|----------|--------------------------|------------------------------|-----------------------------|-----------------------|
| <b>time_0_vs_12</b>                                                                         | <b>N</b> | <b>Sum of<br/>Scores</b> | <b>Expected<br/>Under H0</b> | <b>Std Dev<br/>Under H0</b> | <b>Mean<br/>Score</b> |
| <b>0</b>                                                                                    | 19       | 567.0                    | 408.50                       | 37.016974                   | 29.842105             |
| <b>12</b>                                                                                   | 23       | 336.0                    | 494.50                       | 37.016974                   | 14.608696             |

**Average scores were used for ties.**

| <b>Wilcoxon Two-Sample Test</b>                       |          |
|-------------------------------------------------------|----------|
| <b>Statistic</b>                                      | 567.0000 |
| <b>Normal Approximation</b>                           |          |
| <b>Z</b>                                              | 4.2683   |
| <b>One-Sided Pr &gt; Z</b>                            | <.0001   |
| <b>Two-Sided Pr &gt;  Z </b>                          | <.0001   |
| <b>t Approximation</b>                                |          |
| <b>One-Sided Pr &gt; Z</b>                            | <.0001   |
| <b>Two-Sided Pr &gt;  Z </b>                          | 0.0001   |
| <b>Z includes a continuity correction<br/>of 0.5.</b> |          |

| <b>Kruskal-Wallis Test</b> |         |
|----------------------------|---------|
| <b>Chi-Square</b>          | 18.3340 |
| <b>DF</b>                  | 1       |
| <b>Pr &gt; Chi-Square</b>  | <.0001  |

The UNIVARIATE Procedure

Variable: HCV (HCV)

Treat=cv\_log time\_24\_months

| <b>Moments</b>         |            |                         |            |
|------------------------|------------|-------------------------|------------|
| <b>N</b>               | 23         | <b>Sum Weights</b>      | 23         |
| <b>Mean</b>            | 1.63978574 | <b>Sum Observations</b> | 37.7150719 |
| <b>Std Deviation</b>   | 0.32821062 | <b>Variance</b>         | 0.10772221 |
| <b>Skewness</b>        | 2.58708864 | <b>Kurtosis</b>         | 10.3701658 |
| <b>Uncorrected SS</b>  | 64.2145257 | <b>Corrected SS</b>     | 2.36988866 |
| <b>Coeff Variation</b> | 20.0154577 | <b>Std Error Mean</b>   | 0.06843665 |

| <b>Quantiles (Definition 5)</b> |                 |
|---------------------------------|-----------------|
| <b>Quantile</b>                 | <b>Estimate</b> |
| <b>100% Max</b>                 | 2.91116         |
| <b>99%</b>                      | 2.91116         |
| <b>95%</b>                      | 1.77085         |
| <b>90%</b>                      | 1.69897         |
| <b>75% Q3</b>                   | 1.69897         |
| <b>50% Median</b>               | 1.69897         |
| <b>25% Q1</b>                   | 1.39794         |
| <b>10%</b>                      | 1.30103         |
| <b>5%</b>                       | 1.30103         |
| <b>1%</b>                       | 1.30103         |
| <b>0% Min</b>                   | 1.30103         |



The NPAR1WAY Procedure  
Treat=cv\_log

| <b>Wilcoxon Scores (Rank Sums) for Variable HCV<br/>Classified by Variable time_0_vs_24</b> |          |                          |                              |                             |                       |
|---------------------------------------------------------------------------------------------|----------|--------------------------|------------------------------|-----------------------------|-----------------------|
| <b>time_0_vs_24</b>                                                                         | <b>N</b> | <b>Sum of<br/>Scores</b> | <b>Expected<br/>Under H0</b> | <b>Std Dev<br/>Under H0</b> | <b>Mean<br/>Score</b> |
| <b>0</b>                                                                                    | 19       | 583.50                   | 408.50                       | 37.949589                   | 30.710526             |
| <b>24</b>                                                                                   | 23       | 319.50                   | 494.50                       | 37.949589                   | 13.891304             |

**Average scores were used for ties.**

| <b>Wilcoxon Two-Sample Test</b>                       |          |
|-------------------------------------------------------|----------|
| <b>Statistic</b>                                      | 583.5000 |
| <b>Normal Approximation</b>                           |          |
| <b>Z</b>                                              | 4.5982   |
| <b>One-Sided Pr &gt; Z</b>                            | <.0001   |
| <b>Two-Sided Pr &gt;  Z </b>                          | <.0001   |
| <b>t Approximation</b>                                |          |
| <b>One-Sided Pr &gt; Z</b>                            | <.0001   |
| <b>Two-Sided Pr &gt;  Z </b>                          | <.0001   |
| <b>Z includes a continuity correction<br/>of 0.5.</b> |          |

| <b>Kruskal-Wallis Test</b> |         |
|----------------------------|---------|
| <b>Chi-Square</b>          | 21.2648 |
| <b>DF</b>                  | 1       |
| <b>Pr &gt; Chi-Square</b>  | <.0001  |

The NPAR1WAY Procedure  
Treat=cv\_log

**Wilcoxon Scores (Rank Sums) for Variable HCV  
Classified by Variable time\_12\_vs\_24**

| <b>time_12_vs_24</b> | <b>N</b> | <b>Sum of<br/>Scores</b> | <b>Expected<br/>Under H0</b> | <b>Std Dev<br/>Under H0</b> | <b>Mean<br/>Score</b> |
|----------------------|----------|--------------------------|------------------------------|-----------------------------|-----------------------|
| 12                   | 23       | 597.50                   | 540.50                       | 39.336864                   | 25.978261             |
| 24                   | 23       | 483.50                   | 540.50                       | 39.336864                   | 21.021739             |

Average scores were used for ties.

**Wilcoxon Two-Sample Test**

**Statistic** 597.5000

**Normal Approximation**

**Z** 1.4363

**One-Sided Pr > Z** 0.0755

**Two-Sided Pr > |Z|** 0.1509

**t Approximation**

**One-Sided Pr > Z** 0.0789

**Two-Sided Pr > |Z|** 0.1578

**Z includes a continuity correction  
of 0.5.**

**Kruskal-Wallis Test**

**Chi-Square** 2.0997

**DF** 1

**Pr > Chi-Square** 0.1473

The UNIVARIATE Procedure

Variable: hepatitis (hepatitis)

cd\_4\_naïve

| <b>Moments</b>         |            |                         |            |
|------------------------|------------|-------------------------|------------|
| <b>N</b>               | 47         | <b>Sum Weights</b>      | 47         |
| <b>Mean</b>            | 353.893617 | <b>Sum Observations</b> | 16633      |
| <b>Std Deviation</b>   | 235.479182 | <b>Variance</b>         | 55450.445  |
| <b>Skewness</b>        | 1.50883137 | <b>Kurtosis</b>         | 2.83466909 |
| <b>Uncorrected SS</b>  | 8437033    | <b>Corrected SS</b>     | 2550720.47 |
| <b>Coeff Variation</b> | 66.5395391 | <b>Std Error Mean</b>   | 34.3481688 |

| <b>Quantiles (Definition 5)</b> |                 |
|---------------------------------|-----------------|
| <b>Quantile</b>                 | <b>Estimate</b> |
| <b>100% Max</b>                 | 1171            |
| <b>99%</b>                      | 1171            |
| <b>95%</b>                      | 869             |
| <b>90%</b>                      | 697             |
| <b>75% Q3</b>                   | 467             |
| <b>50% Median</b>               | 312             |
| <b>25% Q1</b>                   | 202             |
| <b>10%</b>                      | 128             |
| <b>5%</b>                       | 67              |
| <b>1%</b>                       | 30              |
| <b>0% Min</b>                   | 30              |

The UNIVARIATE Procedure  
 Variable: hepatitis (hepatitis)  
 Treat=cd\_4\_time\_12\_months

| <b>Moments</b>         |            |                         |            |
|------------------------|------------|-------------------------|------------|
| <b>N</b>               | 47         | <b>Sum Weights</b>      | 47         |
| <b>Mean</b>            | 462.387289 | <b>Sum Observations</b> | 21732.2026 |
| <b>Std Deviation</b>   | 224.311503 | <b>Variance</b>         | 50315.6504 |
| <b>Skewness</b>        | 1.20229569 | <b>Kurtosis</b>         | 1.52505047 |
| <b>Uncorrected SS</b>  | 12363214.1 | <b>Corrected SS</b>     | 2314519.92 |
| <b>Coeff Variation</b> | 48.5116067 | <b>Std Error Mean</b>   | 32.7191955 |

| <b>Quantiles (Definition 5)</b> |                 |
|---------------------------------|-----------------|
| <b>Quantile</b>                 | <b>Estimate</b> |
| <b>100% Max</b>                 | 1103.000        |
| <b>99%</b>                      | 1103.000        |
| <b>95%</b>                      | 1009.330        |
| <b>90%</b>                      | 706.000         |
| <b>75% Q3</b>                   | 568.500         |
| <b>50% Median</b>               | 435.333         |
| <b>25% Q1</b>                   | 266.330         |
| <b>10%</b>                      | 233.000         |
| <b>5%</b>                       | 208.000         |
| <b>1%</b>                       | 191.000         |
| <b>0% Min</b>                   | 191.000         |

The NPAR1WAY Procedure  
Treat=cd\_4

**Wilcoxon Scores (Rank Sums) for Variable hepatitis  
Classified by Variable time\_0\_vs\_12**

| <b>time_0_vs_12</b> | <b>N</b> | <b>Sum of Scores</b> | <b>Expected Under H0</b> | <b>Std Dev Under H0</b> | <b>Mean Score</b> |
|---------------------|----------|----------------------|--------------------------|-------------------------|-------------------|
| <b>0</b>            | 47       | 1877.0               | 2232.50                  | 132.240932              | 39.936170         |
| <b>12</b>           | 47       | 2588.0               | 2232.50                  | 132.240932              | 55.063830         |

Average scores were used for ties.

**Wilcoxon Two-Sample Test**

**Statistic** 1877.0000

**Normal Approximation**

**Z** -2.6845

**One-Sided Pr < Z** 0.0036

**Two-Sided Pr > |Z|** 0.0073

**t Approximation**

**One-Sided Pr < Z** 0.0043

**Two-Sided Pr > |Z|** 0.0086

**Z includes a continuity correction  
of 0.5.**

**Kruskal-Wallis Test**

**Chi-Square** 7.2268

**DF** 1

**Pr > Chi-Square** 0.0072

The UNIVARIATE Procedure  
 Variable: hepatitis (hepatitis)  
 Treat=cd\_4\_time\_24\_months

| <b>Moments</b>         |            |                         |            |
|------------------------|------------|-------------------------|------------|
| <b>N</b>               | 47         | <b>Sum Weights</b>      | 47         |
| <b>Mean</b>            | 560.042394 | <b>Sum Observations</b> | 26321.9925 |
| <b>Std Deviation</b>   | 207.748795 | <b>Variance</b>         | 43159.562  |
| <b>Skewness</b>        | 0.61617295 | <b>Kurtosis</b>         | 0.24658514 |
| <b>Uncorrected SS</b>  | 16726771.6 | <b>Corrected SS</b>     | 1985339.85 |
| <b>Coeff Variation</b> | 37.0951909 | <b>Std Error Mean</b>   | 30.3032763 |

| <b>Quantiles (Definition 5)</b> |                 |
|---------------------------------|-----------------|
| <b>Quantile</b>                 | <b>Estimate</b> |
| <b>100% Max</b>                 | 1127.00         |
| <b>99%</b>                      | 1127.00         |
| <b>95%</b>                      | 908.00          |
| <b>90%</b>                      | 834.66          |
| <b>75% Q3</b>                   | 662.00          |
| <b>50% Median</b>               | 554.00          |
| <b>25% Q1</b>                   | 406.00          |
| <b>10%</b>                      | 312.60          |
| <b>5%</b>                       | 279.50          |
| <b>1%</b>                       | 170.00          |
| <b>0% Min</b>                   | 170.00          |

The NPAR1WAY Procedure  
Treat=cd\_4

**Wilcoxon Scores (Rank Sums) for Variable hepatitis  
Classified by Variable time\_0\_vs\_24**

| time_0_vs_24 | N  | Sum of Scores | Expected Under H0 | Std Dev Under H0 | Mean Score |
|--------------|----|---------------|-------------------|------------------|------------|
| 0            | 47 | 1596.0        | 2232.50           | 132.241409       | 33.957447  |
| 24           | 47 | 2869.0        | 2232.50           | 132.241409       | 61.042553  |

**Average scores were used for ties.**

**Wilcoxon Two-Sample Test**

|                                                       |           |
|-------------------------------------------------------|-----------|
| <b>Statistic</b>                                      | 1596.0000 |
| <b>Normal Approximation</b>                           |           |
| <b>Z</b>                                              | -4.8094   |
| <b>One-Sided Pr &lt; Z</b>                            | <.0001    |
| <b>Two-Sided Pr &gt;  Z </b>                          | <.0001    |
| <b>t Approximation</b>                                |           |
| <b>One-Sided Pr &lt; Z</b>                            | <.0001    |
| <b>Two-Sided Pr &gt;  Z </b>                          | <.0001    |
| <b>Z includes a continuity correction<br/>of 0.5.</b> |           |

**Kruskal-Wallis Test**

|                           |         |
|---------------------------|---------|
| <b>Chi-Square</b>         | 23.1666 |
| <b>DF</b>                 | 1       |
| <b>Pr &gt; Chi-Square</b> | <.0001  |

The NPAR1WAY Procedure  
Treat=cd\_4

**Wilcoxon Scores (Rank Sums) for Variable hepatitis  
Classified by Variable time\_12\_vs\_24**

| <b>time_12_vs_24</b> | <b>N</b> | <b>Sum of<br/>Scores</b> | <b>Expected<br/>Under H0</b> | <b>Std Dev<br/>Under H0</b> | <b>Mean<br/>Score</b> |
|----------------------|----------|--------------------------|------------------------------|-----------------------------|-----------------------|
| <b>12</b>            | 47       | 1903.50                  | 2232.50                      | 132.240932                  | 40.50                 |
| <b>24</b>            | 47       | 2561.50                  | 2232.50                      | 132.240932                  | 54.50                 |

Average scores were used for ties.

**Wilcoxon Two-Sample Test**

**Statistic** 1903.5000

**Normal Approximation**

**Z** -2.4841

**One-Sided Pr < Z** 0.0065

**Two-Sided Pr > |Z|** 0.0130

**t Approximation**

**One-Sided Pr < Z** 0.0074

**Two-Sided Pr > |Z|** 0.0148

**Z includes a continuity correction  
of 0.5.**

**Kruskal-Wallis Test**

**Chi-Square** 6.1896

**DF** 1

**Pr > Chi-Square** 0.0129



The UNIVARIATE Procedure  
 Variable: hepatitis (hepatitis)  
 cd\_4:cd\_8\_naïve

| <b>Moments</b>         |            |                         |            |
|------------------------|------------|-------------------------|------------|
| <b>N</b>               | 47         | <b>Sum Weights</b>      | 47         |
| <b>Mean</b>            | 0.39957447 | <b>Sum Observations</b> | 18.78      |
| <b>Std Deviation</b>   | 0.3236474  | <b>Variance</b>         | 0.10474764 |
| <b>Skewness</b>        | 1.69613778 | <b>Kurtosis</b>         | 3.2478416  |
| <b>Uncorrected SS</b>  | 12.3224    | <b>Corrected SS</b>     | 4.81839149 |
| <b>Coeff Variation</b> | 80.9980187 | <b>Std Error Mean</b>   | 0.04720883 |

| <b>Quantiles (Definition 5)</b> |                 |
|---------------------------------|-----------------|
| <b>Quantile</b>                 | <b>Estimate</b> |
| <b>100% Max</b>                 | 1.59            |
| <b>99%</b>                      | 1.59            |
| <b>95%</b>                      | 0.96            |
| <b>90%</b>                      | 0.93            |
| <b>75% Q3</b>                   | 0.50            |
| <b>50% Median</b>               | 0.30            |
| <b>25% Q1</b>                   | 0.17            |
| <b>10%</b>                      | 0.12            |
| <b>5%</b>                       | 0.06            |
| <b>1%</b>                       | 0.04            |
| <b>0% Min</b>                   | 0.04            |

The UNIVARIATE Procedure  
 Variable: hepatitis (hepatitis)  
 Treat=cd\_4:cd\_8\_time\_12\_months

| <b>Moments</b>         |            |                         |            |
|------------------------|------------|-------------------------|------------|
| <b>N</b>               | 47         | <b>Sum Weights</b>      | 47         |
| <b>Mean</b>            | 0.52791123 | <b>Sum Observations</b> | 24.8118277 |
| <b>Std Deviation</b>   | 0.33865149 | <b>Variance</b>         | 0.11468483 |
| <b>Skewness</b>        | 1.7241357  | <b>Kurtosis</b>         | 3.90472742 |
| <b>Uncorrected SS</b>  | 18.3739449 | <b>Corrected SS</b>     | 5.2755024  |
| <b>Coeff Variation</b> | 64.1493259 | <b>Std Error Mean</b>   | 0.0493974  |

| <b>Quantiles (Definition 5)</b> |                 |
|---------------------------------|-----------------|
| <b>Quantile</b>                 | <b>Estimate</b> |
| <b>100% Max</b>                 | 1.807882        |
| <b>99%</b>                      | 1.807882        |
| <b>95%</b>                      | 1.202538        |
| <b>90%</b>                      | 0.992703        |
| <b>75% Q3</b>                   | 0.632539        |
| <b>50% Median</b>               | 0.481043        |
| <b>25% Q1</b>                   | 0.291814        |
| <b>10%</b>                      | 0.188291        |
| <b>5%</b>                       | 0.167385        |
| <b>1%</b>                       | 0.105423        |
| <b>0% Min</b>                   | 0.105423        |

The NPAR1WAY Procedure  
Treat=cd\_4\_8

**Wilcoxon Scores (Rank Sums) for Variable hepatitis  
Classified by Variable time\_0\_vs\_12**

| <b>time_0_vs_12</b> | <b>N</b> | <b>Sum of Scores</b> | <b>Expected Under H0</b> | <b>Std Dev Under H0</b> | <b>Mean Score</b> |
|---------------------|----------|----------------------|--------------------------|-------------------------|-------------------|
| <b>0</b>            | 47       | 1901.0               | 2232.50                  | 132.236154              | 40.446809         |
| <b>12</b>           | 47       | 2564.0               | 2232.50                  | 132.236154              | 54.553191         |

**Average scores were used for ties.**

**Wilcoxon Two-Sample Test**

|                                                   |           |
|---------------------------------------------------|-----------|
| <b>Statistic</b>                                  | 1901.0000 |
| <b>Normal Approximation</b>                       |           |
| <b>Z</b>                                          | -2.5031   |
| <b>One-Sided Pr &lt; Z</b>                        | 0.0062    |
| <b>Two-Sided Pr &gt;  Z </b>                      | 0.0123    |
| <b>t Approximation</b>                            |           |
| <b>One-Sided Pr &lt; Z</b>                        | 0.0070    |
| <b>Two-Sided Pr &gt;  Z </b>                      | 0.0141    |
| <b>Z includes a continuity correction of 0.5.</b> |           |

**Kruskal-Wallis Test**

|                           |        |
|---------------------------|--------|
| <b>Chi-Square</b>         | 6.2844 |
| <b>DF</b>                 | 1      |
| <b>Pr &gt; Chi-Square</b> | 0.0122 |

The UNIVARIATE Procedure

Variable: hepatitis (hepatitis)

Treat=cd\_4:cd\_8 time\_24\_months

| <b>Moments</b>         |            |                         |            |
|------------------------|------------|-------------------------|------------|
| <b>N</b>               | 47         | <b>Sum Weights</b>      | 47         |
| <b>Mean</b>            | 0.65347821 | <b>Sum Observations</b> | 30.713476  |
| <b>Std Deviation</b>   | 0.31192005 | <b>Variance</b>         | 0.09729412 |
| <b>Skewness</b>        | 1.20759219 | <b>Kurtosis</b>         | 2.36382749 |
| <b>Uncorrected SS</b>  | 24.5461169 | <b>Corrected SS</b>     | 4.4755295  |
| <b>Coeff Variation</b> | 47.7322804 | <b>Std Error Mean</b>   | 0.04549822 |

| <b>Quantiles (Definition 5)</b> |                 |
|---------------------------------|-----------------|
| <b>Quantile</b>                 | <b>Estimate</b> |
| <b>100% Max</b>                 | 1.739198        |
| <b>99%</b>                      | 1.739198        |
| <b>95%</b>                      | 1.313138        |
| <b>90%</b>                      | 0.964548        |
| <b>75% Q3</b>                   | 0.855786        |
| <b>50% Median</b>               | 0.614629        |
| <b>25% Q1</b>                   | 0.458201        |
| <b>10%</b>                      | 0.331034        |
| <b>5%</b>                       | 0.232814        |
| <b>1%</b>                       | 0.173293        |
| <b>0% Min</b>                   | 0.173293        |

The NPAR1WAY Procedure  
Treat=cd\_4\_8

**Wilcoxon Scores (Rank Sums) for Variable hepatitis  
Classified by Variable time\_0\_24**

| <b>time_0_24</b> | <b>N</b> | <b>Sum of Scores</b> | <b>Expected Under H0</b> | <b>Std Dev Under H0</b> | <b>Mean Score</b> |
|------------------|----------|----------------------|--------------------------|-------------------------|-------------------|
| <b>0</b>         | 47       | 1650.0               | 2232.50                  | 132.236154              | 35.106383         |
| <b>24</b>        | 47       | 2815.0               | 2232.50                  | 132.236154              | 59.893617         |

**Average scores were used for ties.**

**Wilcoxon Two-Sample Test**

**Statistic** 1650.0000

**Normal Approximation**

**Z** -4.4012

**One-Sided Pr < Z** <.0001

**Two-Sided Pr > |Z|** <.0001

**t Approximation**

**One-Sided Pr < Z** <.0001

**Two-Sided Pr > |Z|** <.0001

**Z includes a continuity correction  
of 0.5.**

**Kruskal-Wallis Test**

**Chi-Square** 19.4040

**DF** 1

**Pr > Chi-Square** <.0001

The NPAR1WAY Procedure  
Treat=cd\_4\_8

| <b>Wilcoxon Scores (Rank Sums) for Variable hepatitis<br/>Classified by Variable time_12_vs_24</b> |          |                          |                              |                             |                       |
|----------------------------------------------------------------------------------------------------|----------|--------------------------|------------------------------|-----------------------------|-----------------------|
| <b>time_12_vs_24</b>                                                                               | <b>N</b> | <b>Sum of<br/>Scores</b> | <b>Expected<br/>Under H0</b> | <b>Std Dev<br/>Under H0</b> | <b>Mean<br/>Score</b> |
| <b>12</b>                                                                                          | 47       | 1912.0                   | 2232.50                      | 132.241887                  | 40.680851             |
| <b>24</b>                                                                                          | 47       | 2553.0                   | 2232.50                      | 132.241887                  | 54.319149             |

| <b>Wilcoxon Two-Sample Test</b>                       |           |
|-------------------------------------------------------|-----------|
| <b>Statistic</b>                                      | 1912.0000 |
| <b>Normal Approximation</b>                           |           |
| <b>Z</b>                                              | -2.4198   |
| <b>One-Sided Pr &lt; Z</b>                            | 0.0078    |
| <b>Two-Sided Pr &gt;  Z </b>                          | 0.0155    |
| <b>t Approximation</b>                                |           |
| <b>One-Sided Pr &lt; Z</b>                            | 0.0087    |
| <b>Two-Sided Pr &gt;  Z </b>                          | 0.0175    |
| <b>Z includes a continuity correction<br/>of 0.5.</b> |           |

| <b>Kruskal-Wallis Test</b> |        |
|----------------------------|--------|
| <b>Chi-Square</b>          | 5.8738 |
| <b>DF</b>                  | 1      |
| <b>Pr &gt; Chi-Square</b>  | 0.0154 |

The UNIVARIATE Procedure  
 Variable: hepatitis (hepatitis)  
 cv\_log\_naïve

| <b>Moments</b>         |            |                         |            |
|------------------------|------------|-------------------------|------------|
| <b>N</b>               | 39         | <b>Sum Weights</b>      | 39         |
| <b>Mean</b>            | 3.20837    | <b>Sum Observations</b> | 77.0008801 |
| <b>Std Deviation</b>   | 1.1555229  | <b>Variance</b>         | 1.33523317 |
| <b>Skewness</b>        | -0.2632938 | <b>Kurtosis</b>         | -1.6299519 |
| <b>Uncorrected SS</b>  | 277.757677 | <b>Corrected SS</b>     | 30.7103629 |
| <b>Coeff Variation</b> | 36.0158865 | <b>Std Error Mean</b>   | 0.23587012 |

| <b>Quantiles (Definition 5)</b> |                 |
|---------------------------------|-----------------|
| <b>Quantile</b>                 | <b>Estimate</b> |
| <b>100% Max</b>                 | 4.69512         |
| <b>99%</b>                      | 4.69512         |
| <b>95%</b>                      | 4.60977         |
| <b>90%</b>                      | 4.53667         |
| <b>75% Q3</b>                   | 4.21188         |
| <b>50% Median</b>               | 3.55601         |
| <b>25% Q1</b>                   | 1.69897         |
| <b>10%</b>                      | 1.69897         |
| <b>5%</b>                       | 1.69897         |
| <b>1%</b>                       | 1.69897         |
| <b>0% Min</b>                   | 1.69897         |

The UNIVARIATE Procedure  
 Variable: hepatitis (hepatitis)  
 Treat=cv\_log time\_12\_months

| <b>Moments</b>         |            |                         |            |
|------------------------|------------|-------------------------|------------|
| <b>N</b>               | 47         | <b>Sum Weights</b>      | 47         |
| <b>Mean</b>            | 1.83608391 | <b>Sum Observations</b> | 86.2959436 |
| <b>Std Deviation</b>   | 0.43927616 | <b>Variance</b>         | 0.19296354 |
| <b>Skewness</b>        | 2.18154879 | <b>Kurtosis</b>         | 5.34636267 |
| <b>Uncorrected SS</b>  | 167.322916 | <b>Corrected SS</b>     | 8.87632305 |
| <b>Coeff Variation</b> | 23.9246234 | <b>Std Error Mean</b>   | 0.06407501 |

| <b>Quantiles (Definition 5)</b> |                 |
|---------------------------------|-----------------|
| <b>Quantile</b>                 | <b>Estimate</b> |
| <b>100% Max</b>                 | 3.58422         |
| <b>99%</b>                      | 3.58422         |
| <b>95%</b>                      | 2.80889         |
| <b>90%</b>                      | 2.60206         |
| <b>75% Q3</b>                   | 1.77815         |
| <b>50% Median</b>               | 1.69897         |
| <b>25% Q1</b>                   | 1.69897         |
| <b>10%</b>                      | 1.39794         |
| <b>5%</b>                       | 1.30103         |
| <b>1%</b>                       | 1.30103         |
| <b>0% Min</b>                   | 1.30103         |



The NPAR1WAY Procedure  
Treat=cv\_log

**Wilcoxon Scores (Rank Sums) for Variable hepatitis  
Classified by Variable time\_0\_vs\_12**

| <b>time_0_vs_12</b> | <b>N</b> | <b>Sum of<br/>Scores</b> | <b>Expected<br/>Under H0</b> | <b>Std Dev<br/>Under H0</b> | <b>Mean<br/>Score</b> |
|---------------------|----------|--------------------------|------------------------------|-----------------------------|-----------------------|
| <b>0</b>            | 39       | 1233.0                   | 864.0                        | 78.027963                   | 51.375000             |
| <b>12</b>           | 47       | 1323.0                   | 1692.0                       | 78.027963                   | 28.148936             |

**Average scores were used for ties.**

**Wilcoxon Two-Sample Test**

|                                                       |           |
|-------------------------------------------------------|-----------|
| <b>Statistic</b>                                      | 1233.0000 |
| <b>Normal Approximation</b>                           |           |
| <b>Z</b>                                              | 4.7227    |
| <b>One-Sided Pr &gt; Z</b>                            | <.0001    |
| <b>Two-Sided Pr &gt;  Z </b>                          | <.0001    |
| <b>t Approximation</b>                                |           |
| <b>One-Sided Pr &gt; Z</b>                            | <.0001    |
| <b>Two-Sided Pr &gt;  Z </b>                          | <.0001    |
| <b>Z includes a continuity correction<br/>of 0.5.</b> |           |

**Kruskal-Wallis Test**

|                           |         |
|---------------------------|---------|
| <b>Chi-Square</b>         | 22.3641 |
| <b>DF</b>                 | 1       |
| <b>Pr &gt; Chi-Square</b> | <.0001  |

The UNIVARIATE Procedure

Variable: hepatitis (hepatitis)

Treat=cv\_log time\_24\_months

| <b>Moments</b>         |            |                         |            |
|------------------------|------------|-------------------------|------------|
| <b>N</b>               | 47         | <b>Sum Weights</b>      | 47         |
| <b>Mean</b>            | 1.63999142 | <b>Sum Observations</b> | 77.0795966 |
| <b>Std Deviation</b>   | 0.33100244 | <b>Variance</b>         | 0.10956262 |
| <b>Skewness</b>        | 2.55031731 | <b>Kurtosis</b>         | 9.3591623  |
| <b>Uncorrected SS</b>  | 131.449757 | <b>Corrected SS</b>     | 5.03988036 |
| <b>Coeff Variation</b> | 20.1831814 | <b>Std Error Mean</b>   | 0.04828167 |

| <b>Quantiles (Definition 5)</b> |                 |
|---------------------------------|-----------------|
| <b>Quantile</b>                 | <b>Estimate</b> |
| <b>100% Max</b>                 | 2.99056         |
| <b>99%</b>                      | 2.99056         |
| <b>95%</b>                      | 1.83251         |
| <b>90%</b>                      | 1.75587         |
| <b>75% Q3</b>                   | 1.69897         |
| <b>50% Median</b>               | 1.69897         |
| <b>25% Q1</b>                   | 1.39794         |
| <b>10%</b>                      | 1.30103         |
| <b>5%</b>                       | 1.30103         |
| <b>1%</b>                       | 1.30103         |
| <b>0% Min</b>                   | 1.30103         |

The NPAR1WAY Procedure  
Treat=cv\_log

**Wilcoxon Scores (Rank Sums) for Variable hepatitis  
Classified by Variable time\_0\_vs\_24**

| <b>time_0_vs_24</b> | <b>N</b> | <b>Sum of Scores</b> | <b>Expected Under H0</b> | <b>Std Dev Under H0</b> | <b>Mean Score</b> |
|---------------------|----------|----------------------|--------------------------|-------------------------|-------------------|
| <b>0</b>            | 39       | 1296.0               | 864.0                    | 77.896960               | 54.000000         |
| <b>24</b>           | 47       | 1260.0               | 1692.0                   | 77.896960               | 26.808511         |

**Average scores were used for ties.**

**Wilcoxon Two-Sample Test**

|                                                       |           |
|-------------------------------------------------------|-----------|
| <b>Statistic</b>                                      | 1296.0000 |
| <b>Normal Approximation</b>                           |           |
| <b>Z</b>                                              | 5.5394    |
| <b>One-Sided Pr &gt; Z</b>                            | <.0001    |
| <b>Two-Sided Pr &gt;  Z </b>                          | <.0001    |
| <b>t Approximation</b>                                |           |
| <b>One-Sided Pr &gt; Z</b>                            | <.0001    |
| <b>Two-Sided Pr &gt;  Z </b>                          | <.0001    |
| <b>Z includes a continuity correction<br/>of 0.5.</b> |           |

**Kruskal-Wallis Test**

|                           |         |
|---------------------------|---------|
| <b>Chi-Square</b>         | 30.7558 |
| <b>DF</b>                 | 1       |
| <b>Pr &gt; Chi-Square</b> | <.0001  |

The NPAR1WAY Procedure  
Treat=cv\_log

| <b>Wilcoxon Scores (Rank Sums) for Variable hepatitis<br/>Classified by Variable time_12_vs_24</b> |          |                          |                              |                             |                       |
|----------------------------------------------------------------------------------------------------|----------|--------------------------|------------------------------|-----------------------------|-----------------------|
| <b>time_12_vs_24</b>                                                                               | <b>N</b> | <b>Sum of<br/>Scores</b> | <b>Expected<br/>Under H0</b> | <b>Std Dev<br/>Under H0</b> | <b>Mean<br/>Score</b> |
| <b>12</b>                                                                                          | 47       | 2552.0                   | 2232.50                      | 120.312575                  | 54.297872             |
| <b>24</b>                                                                                          | 47       | 1913.0                   | 2232.50                      | 120.312575                  | 40.702128             |

**Average scores were used for ties.**

| <b>Wilcoxon Two-Sample Test</b>                       |           |
|-------------------------------------------------------|-----------|
| <b>Statistic</b>                                      | 2552.0000 |
| <b>Normal Approximation</b>                           |           |
| <b>Z</b>                                              | 2.6514    |
| <b>One-Sided Pr &gt; Z</b>                            | 0.0040    |
| <b>Two-Sided Pr &gt;  Z </b>                          | 0.0080    |
| <b>t Approximation</b>                                |           |
| <b>One-Sided Pr &gt; Z</b>                            | 0.0047    |
| <b>Two-Sided Pr &gt;  Z </b>                          | 0.0094    |
| <b>Z includes a continuity correction<br/>of 0.5.</b> |           |

| <b>Kruskal-Wallis Test</b> |        |
|----------------------------|--------|
| <b>Chi-Square</b>          | 7.0521 |
| <b>DF</b>                  | 1      |
| <b>Pr &gt; Chi-Square</b>  | 0.0079 |

| Frequency<br>Col Pct | Table of cd4_diagnosis_transformed by naïve |             |            |       |
|----------------------|---------------------------------------------|-------------|------------|-------|
|                      | <200                                        | 200-500     | >500       | Total |
| <b>HIV-HBV</b>       | 5<br>20.84                                  | 15<br>62.50 | 4<br>16.66 | 24    |
| <b>HIV-HCV</b>       | 6<br>26.09                                  | 13<br>56.52 | 4<br>17.39 | 23    |
| <b>HIV-hepatitis</b> | 11<br>23.41                                 | 28<br>59.57 | 8<br>17.02 | 47    |
| <b>Total</b>         | 22                                          | 56          | 16         | 94    |

| Frequency<br>Col Pct | Table of cd4_diagnosis_transformed by 12 months |             |             |       |
|----------------------|-------------------------------------------------|-------------|-------------|-------|
|                      | <200                                            | 200-500     | >500        | Total |
| <b>HIV-HBV</b>       | 1<br>4.17                                       | 11<br>45.83 | 12<br>50.00 | 24    |
| <b>HIV-HCV</b>       | 1<br>4.17                                       | 16<br>69.57 | 6<br>26.08  | 23    |
| <b>HIV-hepatitis</b> | 2<br>4.26                                       | 27<br>57.45 | 18<br>38.29 | 47    |
| <b>Total</b>         | 4                                               | 54          | 36          | 94    |

| Frequency<br>Col Pct | Table of cd4_diagnosis_transformed by 24 months |             |             |       |
|----------------------|-------------------------------------------------|-------------|-------------|-------|
|                      | <200                                            | 200-500     | >500        | Total |
| <b>HIV-HBV</b>       | 1<br>4.17                                       | 7<br>29.17  | 16<br>66.66 | 24    |
| <b>HIV-HCV</b>       | 0<br>0.00                                       | 12<br>52.17 | 11<br>47.83 | 23    |
| <b>HIV-hepatitis</b> | 1<br>2.13                                       | 19<br>40.43 | 27<br>57.44 | 47    |
| <b>Total</b>         | 4                                               | 54          | 36          | 94    |

Statistics for Table of cd4\_diagnosis  
HIV-HBV time naïve vs 12

| Statistic         | DF | Value | Prob   |
|-------------------|----|-------|--------|
| <b>Chi-Square</b> | 2  | 7.282 | 0.0262 |

Statistics for Table of cd4\_diagnosis

HIV-HBV time naïve vs 24

| <b>Statistic</b>  | <b>DF</b> | <b>Value</b> | <b>Prob</b> |
|-------------------|-----------|--------------|-------------|
| <b>Chi-Square</b> | 2         | 12.776       | 0.0017      |

Statistics for Table of cd4\_diagnosis

HIV-HBV time 12 vs 24

| <b>Statistic</b>  | <b>DF</b> | <b>Value</b> | <b>Prob</b> |
|-------------------|-----------|--------------|-------------|
| <b>Chi-Square</b> | 2         | 1.460        | 0.4818      |

Statistics for Table of cd4\_diagnosis

HIV-HCV time naïve vs 12

| <b>Statistic</b>  | <b>DF</b> | <b>Value</b> | <b>Prob</b> |
|-------------------|-----------|--------------|-------------|
| <b>Chi-Square</b> | 2         | 4.282        | 0.1176      |

Statistics for Table of cd4\_diagnosis

HIV-HCV time naïve vs 24

| <b>Statistic</b>  | <b>DF</b> | <b>Value</b> | <b>Prob</b> |
|-------------------|-----------|--------------|-------------|
| <b>Chi-Square</b> | 2         | 9.307        | 0.0095      |

Statistics for Table of cd4\_diagnosis

HIV-HCV time 12 vs 24

| <b>Statistic</b>  | <b>DF</b> | <b>Value</b> | <b>Prob</b> |
|-------------------|-----------|--------------|-------------|
| <b>Chi-Square</b> | 2         | 3.042        | 0.2185      |

Statistics for Table of cd4\_diagnosis

hepatitis time naïve vs 12

| <b>Statistic</b>  | <b>DF</b> | <b>Value</b> | <b>Prob</b> |
|-------------------|-----------|--------------|-------------|
| <b>Chi-Square</b> | 2         | 10.095       | 0.0064      |

Statistics for Table of cd4\_diagnosis

hepatitis time naïve vs 24

| <b>Statistic</b>  | <b>DF</b> | <b>Value</b> | <b>Prob</b> |
|-------------------|-----------|--------------|-------------|
| <b>Chi-Square</b> | 2         | 20.371       | <.0001      |

Statistics for Table of cd4\_diagnosis

hepatitis time 12 vs 24

| <b>Statistic</b>  | <b>DF</b> | <b>Value</b> | <b>Prob</b> |
|-------------------|-----------|--------------|-------------|
| <b>Chi-Square</b> | 2         | 3.525        | 0.1716      |
